# Supplementary material for: Electrocatalytic ring-opening dihydroalkoxylation of N-aryl maleimides with alcohols under metal- and oxidant-free conditions
Source: Royal Society of Chemistry journal article supplement (doi:10.1039/d3ob00178d), 2023-01-01

## Supporting Information

### Electrocatalytic Ring-opening Dihydroalkoxylation of *N*-Aryl Maleimides with Alcohols under Metal- and Oxidant-free Conditions

Zhang zhang,<sup>a</sup> Ying-Chun Wang,<sup>\*a</sup> Hai-tao Tang,<sup>b</sup> Ying-Ming Pan,<sup>b</sup> and Xiu-Jin  
Meng<sup>\*b</sup>

<sup>a</sup> College of Chemistry and Chemical Engineering, Hunan Engineering Laboratory for Analyse  
and Drugs Development of Ethnomedicine in Wuling Mountains, Jishou  
University, Jishou 416000, People's Republic of China

<sup>b</sup> State Key Laboratory for Chemistry and Molecular Engineering of Medicinal Resources, School  
of Chemistry and Pharmaceutical Sciences of Guangxi Normal University, Guilin 541004,  
People's Republic of China

\*E-mail: wangyingchunjsu@163.com; mengxiujin@163.com

### Table of Contents

|                                                                                                                  |          |
|------------------------------------------------------------------------------------------------------------------|----------|
| <b>General Methods</b> .....                                                                                     | S2       |
| <b>Figure S1.</b> Electrolysis setup (undivided cell).....                                                       | S2       |
| <b>Crystallographic Data</b> .....                                                                               | S2-S3    |
| <b>Figure S2.</b> <sup>1</sup> H NMR spectra of product <b>3a</b> and <i>D</i> -labeled product <b>3a'</b> ..... | S4       |
| <b>Figure S3.</b> HRMS spectra of <i>D</i> -labeled product <b>3a'</b> .....                                     | S5       |
| <b>Figure S4.</b> Cyclic voltammograms.....                                                                      | S6       |
| <b>Figure S5.</b> Intermediate <b>E</b> was detected by HRMS.....                                                | S7       |
| <b>Characterization Data for Products 3a-ah</b> .....                                                            | S7-S17   |
| <b>Copies of <sup>1</sup>H NMR, <sup>13</sup>C NMR and <sup>19</sup>F NMR spectra for Products 3a-ah</b> ...     | S18- S46 |

## General Methods.

Proton nuclear magnetic resonance spectra ( $^1\text{H}$  NMR) and carbon nuclear magnetic resonance spectra ( $^{13}\text{C}$  NMR) were recorded at 400 MHz and 100 MHz or 600 MHz and 150 MHz, respectively, using  $\text{CDCl}_3$  as reference standard ( $\delta$  7.26 ppm) for  $^1\text{H}$  NMR and ( $\delta$  77.04 ppm) for  $^{13}\text{C}$  NMR. HRMS spectra were recorded with Micromass QTOF2 Quadrupole/Time-of-Flight Tandem mass spectrometer using electron spray ionization. Melting points were uncorrected. Precoated silica gel plates GF-254 were used for thin-layer analytical chromatography. Column chromatography was performed on silica gel (300-400 mesh). Unless otherwise noted, all reagents were obtained commercially and used without further purification.

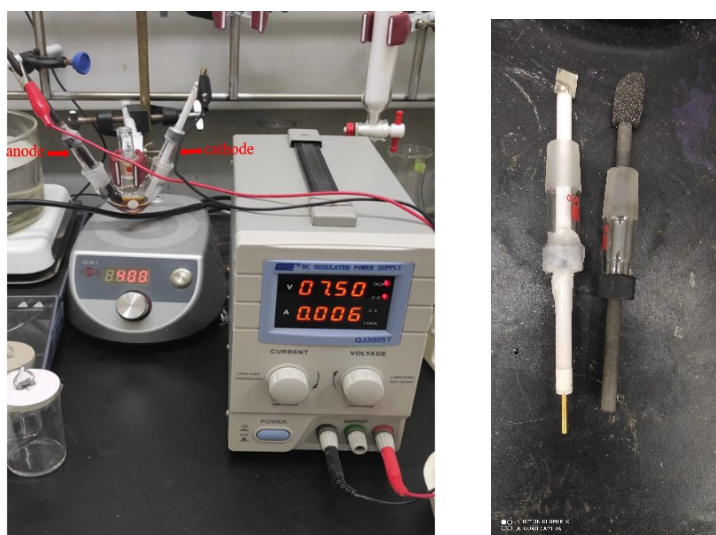

**Figure S1.** Electrolysis setup (undivided cell)

## Crystallographic Data:

**Table S1.** Crystal data and structure refinement of **3n** (CCDC 2210698) (the crystal structure is with ellipsoids at 30% probability level)

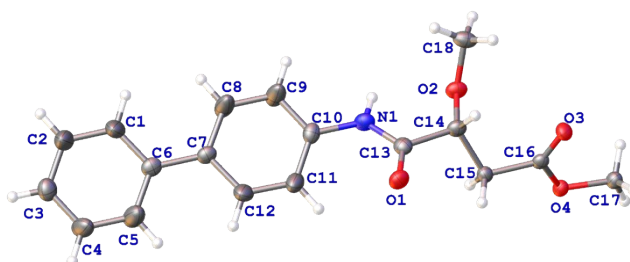

|                                             |                                                               |
|---------------------------------------------|---------------------------------------------------------------|
| Identification code                         | <b>3n</b>                                                     |
| Empirical formula                           | C <sub>18</sub> H <sub>19</sub> NO <sub>4</sub>               |
| Formula weight                              | 313.34                                                        |
| Temperature/K                               | 99.99(10)                                                     |
| Crystal system                              | monoclinic                                                    |
| Space group                                 | P2 <sub>1</sub> /c                                            |
| a/Å                                         | 27.340(4)                                                     |
| b/Å                                         | 5.3646(6)                                                     |
| c/Å                                         | 10.6018(13)                                                   |
| α/°                                         | 90                                                            |
| β/°                                         | 94.192(12)                                                    |
| γ/°                                         | 90                                                            |
| Volume/Å <sup>3</sup>                       | 1550.8(3)                                                     |
| Z                                           | 4                                                             |
| ρ <sub>calc</sub> /cm <sup>3</sup>          | 1.342                                                         |
| μ/mm <sup>-1</sup>                          | 0.779                                                         |
| F(000)                                      | 664.0                                                         |
| Crystal size/mm <sup>3</sup>                | 0.12 × 0.11 × 0.09                                            |
| Radiation                                   | Cu Kα (λ = 1.54184)                                           |
| 2θ range for data collection/°              | 6.484 to 133.182                                              |
| Index ranges                                | -32 ≤ h ≤ 32, -6 ≤ k ≤ 3, -12 ≤ l ≤ 11                        |
| Reflections collected                       | 5702                                                          |
| Independent reflections                     | 2729 [R <sub>int</sub> = 0.0558, R <sub>sigma</sub> = 0.0859] |
| Data/restraints/parameters                  | 2729/0/210                                                    |
| Goodness-of-fit on F <sup>2</sup>           | 1.217                                                         |
| Final R indexes [I >= 2σ (I)]               | R <sub>1</sub> = 0.1125, wR <sub>2</sub> = 0.2955             |
| Final R indexes [all data]                  | R <sub>1</sub> = 0.1369, wR <sub>2</sub> = 0.3212             |
| Largest diff. peak/hole / e Å <sup>-3</sup> | 0.49/-0.38                                                    |

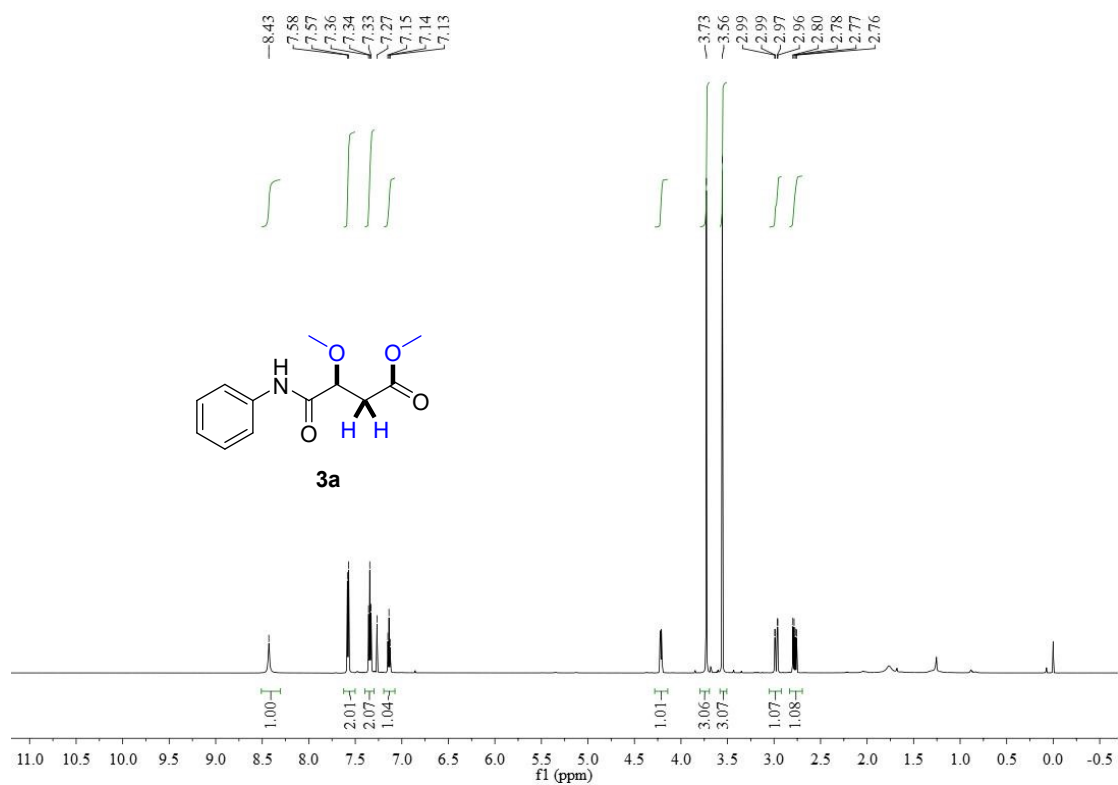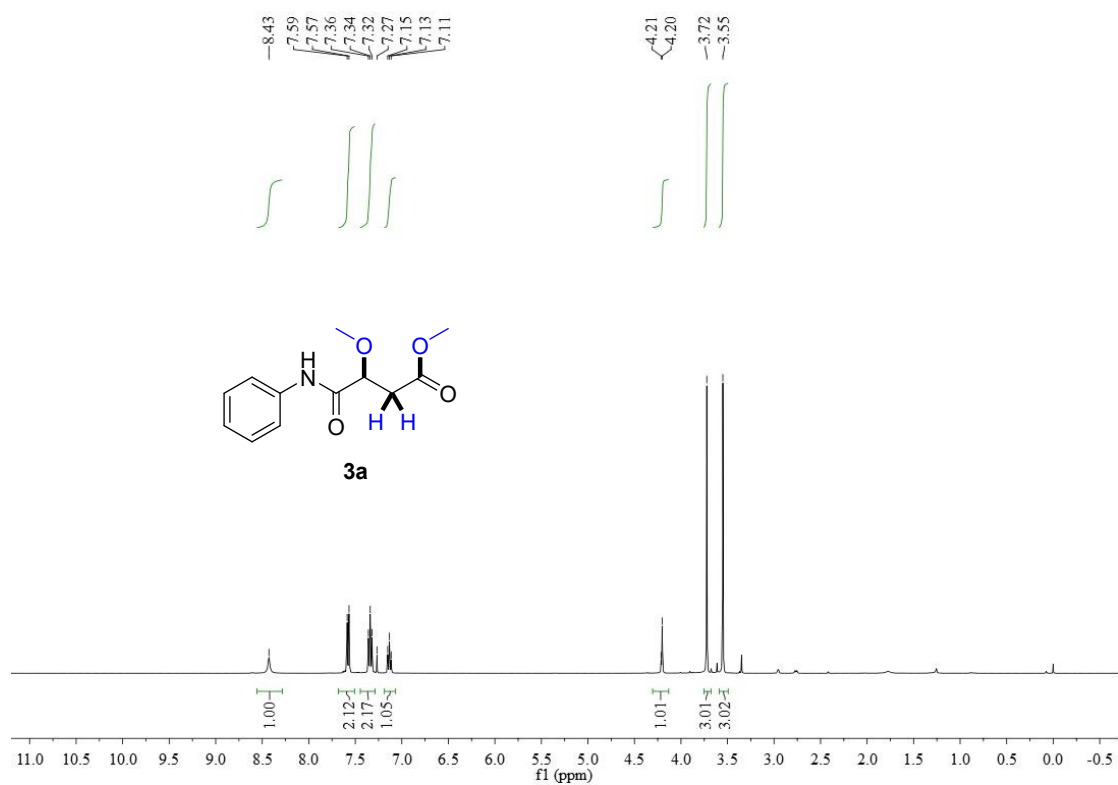

**Figure S2.** <sup>1</sup>H NMR spectra of product **3a** and *D*-labeled product **3a'**

Sample Name  
User Name  
Sample Type  
ACQ Method

zz-ddjc-1  
Sample  
00-LHF.m

Position  
Inj Vol  
IRM Calibration Status  
Comment

P1-A1  
0.2  
Success

Instrument Name  
InjPosition  
Data Filename  
Acquired Time

Instrument 1  
ZZ-DDJC-1.d  
11/2/2022 2:58:29 PM

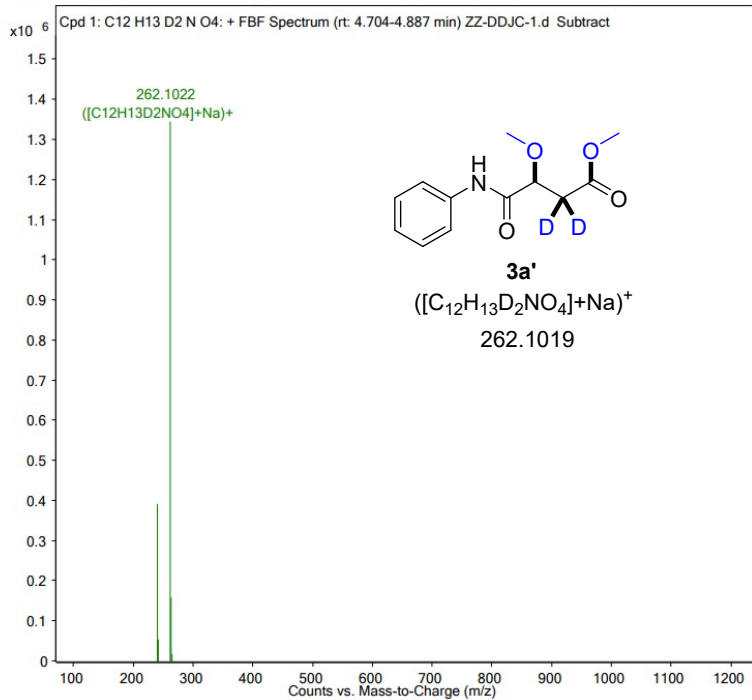

**Figure S3.** HRMS spectra of *D*-labeled product **3a'**

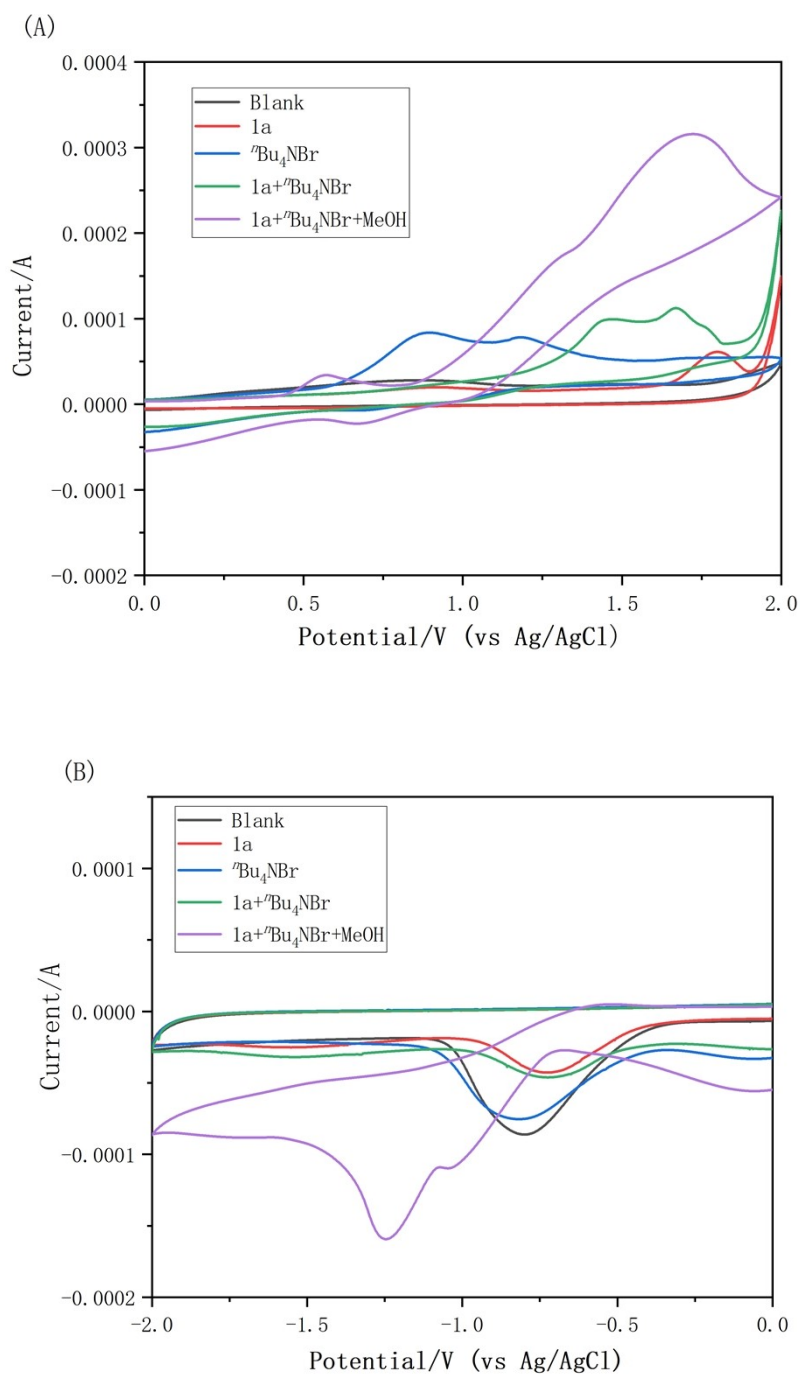

**Figure S4.** Cyclic voltammograms of related compounds in 0.1 M ClLiO<sub>4</sub>/CH<sub>3</sub>CN using a glassy carbon disk working electrode (diameter, 3 mm), a Pt wire auxiliary electrode and a Ag/AgCl reference electrode. Scan rate: 0.1 V s<sup>-1</sup>. (a) Background (LiClO<sub>4</sub> (5 mM) + MeCN (5 mL)) (black curve); (b) **1a** (5 mM) (red curve); (c) <sup>n</sup>Bu<sub>4</sub>NBr (5 mM) (blue curve); (d) **1a** (5 mM) + <sup>n</sup>Bu<sub>4</sub>NBr (5 mM) (green curve); (e) **1a** (5 mM) + <sup>n</sup>Bu<sub>4</sub>NBr (5 mM) + CH<sub>3</sub>OH (50 mM) (purple curve)

|             |                              |                        |         |                 |                     |
|-------------|------------------------------|------------------------|---------|-----------------|---------------------|
| Sample Name | ZZ-TEMPO-2                   | Position               | P1-A1   | Instrument Name | Instrument 1        |
| User Name   |                              | Inj Vol                | 0.2     | InjPosition     |                     |
| Sample Type | Sample                       | IRM Calibration Status | Success | Data Filename   | ZZ-TEMPO-2.d        |
| ACQ Method  | 10-100%ijachun Zheng 7 Min.m | Comment                |         | Acquired Time   | 8/2/2022 5:05:03 PM |

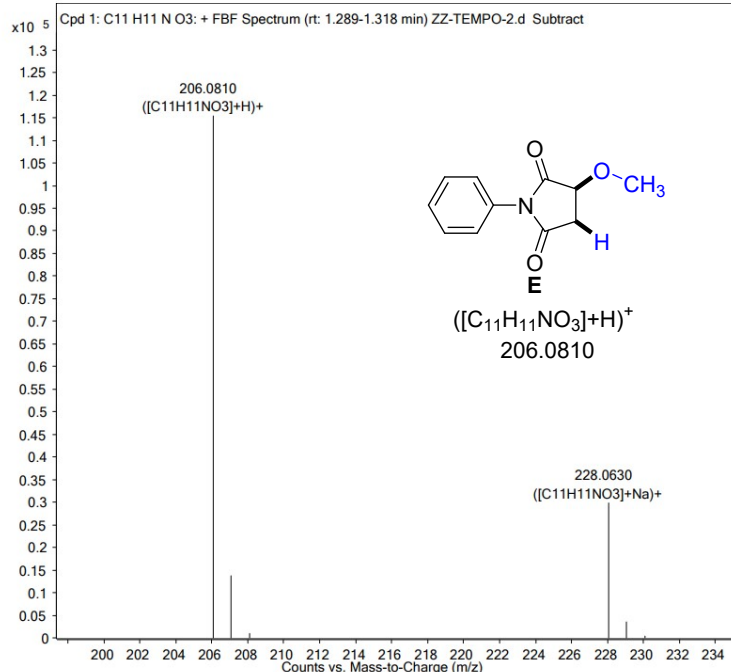

**Figure S5.** Intermediate **E** was detected by HRMS

### Characterization Data for Products **3a**-**ah**

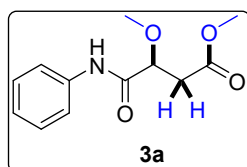

*Methyl 3-methoxy-4-oxo-4-(phenylamino)butanoate (3a).*

Following the general procedure, eluted by petroleum ether/ethyl acetate = 40/1 to 20/1. Yellow oil (39.9 mg, 84%).

$^1\text{H NMR}$  ( $\text{CDCl}_3$ , 600 MHz)  $\delta$  8.42 (s, 1H), 7.58–7.56 (m, 2H), 7.35–7.32 (m, 2H), 7.15–7.12 (m, 1H), 4.21 (dd,  $J = 12.0, 6.0$  Hz, 1H), 3.72 (s, 3H), 3.55 (s, 3H), 2.97 (dd,  $J = 18.0, 6.0$  Hz, 1H), 2.77 (dd,  $J = 12.0, 6.0$  Hz, 1H) ppm;  $^{13}\text{C NMR}$  (150 MHz,  $\text{CDCl}_3$ )  $\delta$  171.0, 169.2, 137.2, 129.2, 124.8, 119.9, 78.9, 59.3, 52.2, 37.5 ppm; HRMS (ESI)  $m/z$ :  $[\text{M} + \text{Na}]^+$  Calcd for  $\text{C}_{12}\text{H}_{15}\text{NNaO}_4$  260.0893; Found 260.0890.

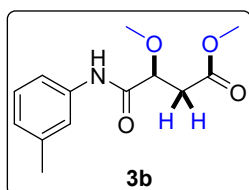

*Methyl 3-methoxy-4-oxo-4-(m-tolylamino)butanoate (3b).*

Following the general procedure, eluted by petroleum

ether/ethyl acetate = 40/1 to 20/1. Brown oil (40.7 mg, 81%).  $^1\text{H}$  NMR ( $\text{CDCl}_3$ , 600 MHz)  $\delta$  8.37 (s, 1H), 7.44–7.43 (m, 1H), 7.36–7.34 (m, 1H), 7.23–7.21 (m, 1H), 6.96–6.94 (m, 1H), 4.20 (dd,  $J = 12.0, 6.0$  Hz, 1H), 3.72 (s, 3H), 3.54 (s, 3H), 2.96 (dd,  $J = 12.0, 6.0$  Hz, 1H), 2.76 (dd,  $J = 12.0, 6.0$  Hz, 1H), 2.34 (s, 3H) ppm;  $^{13}\text{C}$  NMR (150 MHz,  $\text{CDCl}_3$ )  $\delta$  171.0, 169.2, 139.2, 137.1, 129.0, 125.6, 120.5, 116.9, 79.0, 59.3, 52.2, 37.5, 21.6 ppm; HRMS (ESI)  $m/z$ :  $[\text{M} + \text{Na}]^+$  Calcd for  $\text{C}_{13}\text{H}_{17}\text{NNaO}_4$  274.1050; Found 274.1051.

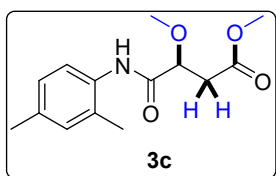

*Methyl 4-((2,4-dimethylphenyl)amino)-3-methoxy-4-oxobutanoate (3c)*. Following the general procedure, eluted by petroleum ether/ethyl acetate = 40/1 to 20/1. Brown oil (28.1mg, 53%).  $^1\text{H}$  NMR ( $\text{CDCl}_3$ , 600 MHz)  $\delta$  8.30 (s, 1H),

7.77–7.76 (m, 1H), 7.03–7.00 (m, 2H), 4.23 (dd,  $J = 12.0, 6.0$  Hz, 1H), 3.73 (s, 3H), 3.57 (s, 3H), 2.99 (dd,  $J = 12.0, 6.0$  Hz, 1H), 2.77 (dd,  $J = 12.0, 6.0$  Hz, 1H), 2.29 (s, 3H), 2.24 (s, 3H) ppm;  $^{13}\text{C}$  NMR (150 MHz,  $\text{CDCl}_3$ )  $\delta$  171.0, 169.1, 135.0, 132.4, 131.3, 128.7, 127.5, 122.4, 79.2, 59.4, 52.1, 37.7, 21.0, 17.6 ppm; HRMS (ESI)  $m/z$ :  $[\text{M} + \text{H}]^+$  Calcd for  $\text{C}_{14}\text{H}_{20}\text{NO}_4$  266.1387; Found 266.1391.

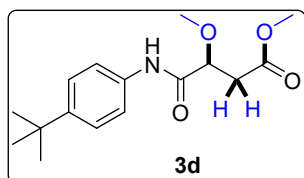

*Methyl 4-((4-isopropylphenyl)amino)-3-methoxy-4-oxobutanoate (3d)*. Following the general procedure, eluted by petroleum ether/ethyl acetate = 40/1 to 20/1. Brown oil (48.7 mg, 83%).  $^1\text{H}$  NMR ( $\text{CDCl}_3$ , 600 MHz)  $\delta$  8.37 (s,

1H), 7.507.48 (m, 2H), 7.37–7.34 (m, 2H), 4.21 (dd,  $J = 12.0, 6.0$  Hz, 1H), 3.72 (s, 3H), 3.54 (s, 3H), 2.96 (dd,  $J = 12.0, 6.0$  Hz, 1H), 2.76 (dd,  $J = 12.0, 6.0$  Hz, 1H), 1.30 (s, 9H) ppm;  $^{13}\text{C}$  NMR (150 MHz,  $\text{CDCl}_3$ )  $\delta$  171.1, 169.1, 147.8, 134.5, 126.0, 119.7, 79.0, 59.3, 52.1, 37.6, 34.5, 31.5 ppm; HRMS (ESI)  $m/z$ :  $[\text{M} + \text{Na}]^+$  Calcd for  $\text{C}_{16}\text{H}_{23}\text{NNaO}_4$  316.1519; Found 316.1524.

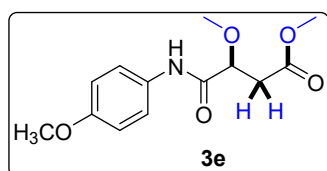

*Methyl 3-methoxy-4-((4-methoxyphenyl)amino)-4-oxobutanoate (3e)*

S8



*oxobutanoate (3e)*. Following the general procedure, eluted by petroleum ether/ethyl acetate = 40/1 to 20/1. Brown oil (40.1 mg, 75%). <sup>1</sup>H NMR (CDCl<sub>3</sub>, 600 MHz) δ 8.32 (s, 1H), 7.49–7.46 (m, 2H), 6.88–6.85 (m, 2H), 4.20 (dd, *J* = 12.0, 6.0 Hz, 1H), 3.79 (s, 3H), 3.72 (s, 3H), 3.54 (s, 3H), 2.96 (dd, *J* = 12.0, 6.0 Hz, 1H), 2.75 (dd, *J* = 12.0, 6.0 Hz, 1H) ppm; <sup>13</sup>C NMR (150 MHz, CDCl<sub>3</sub>) δ 171.1, 169.0, 156.7, 130.3, 121.6, 114.3, 78.9, 59.3, 55.6, 52.1, 37.5 ppm; HRMS (ESI) *m/z*: [M + Na]<sup>+</sup> Calcd for C<sub>13</sub>H<sub>17</sub>NNaO<sub>5</sub> 290.0999; Found 290.0997.

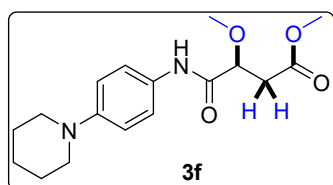

*Methyl 3-methoxy-4-oxo-4-((4-(piperidin-1-yl)phenyl)amino)butanoate (3f)*. Following the general procedure, eluted by petroleum ether/ethyl acetate = 40/1 to 20/1. Yellow oil (49.3 mg, 77%). <sup>1</sup>H NMR

(CDCl<sub>3</sub>, 400MHz) δ 8.27 (s, 1H), 7.44–7.42 (m, 2H), 6.94–6.91 (m, 2H), 4.19 (dd, *J* = 8.0, 4.0 Hz, 1H), 3.72 (s, 3H), 3.54 (s, 3H), 3.11 (t, *J* = 4.0 Hz, 4H), 2.97 (dd, *J* = 16.0, 4.0 Hz, 1H), 2.74 (dd, *J* = 16.0, 8.0 Hz, 1H), 1.74–1.68 (m, 4H), 1.59–1.54 (m, 2H) ppm; <sup>13</sup>C NMR (100 MHz, CDCl<sub>3</sub>) δ 171.1, 168.8, 121.1, 117.3, 79.0, 59.3, 52.1, 51.3, 37.7, 25.9, 24.3 ppm; HRMS (ESI) *m/z*: [M + H]<sup>+</sup> Calcd for C<sub>17</sub>H<sub>25</sub>N<sub>2</sub>O<sub>4</sub> 321.1809; Found 321.1810.

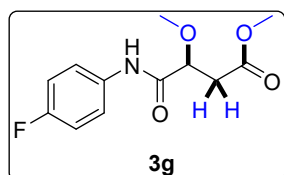

*Methyl 4-((4-fluorophenyl)amino)-3-methoxy-4-oxobutanoate (3g)*. Following the general procedure, eluted by petroleum ether/ethyl acetate = 40/1 to 20/1. Yellow oil

(37.3 mg, 73%). <sup>1</sup>H NMR (CDCl<sub>3</sub>, 600 MHz) δ 8.42 (s, 1H), 7.54–7.52 (m, 2H), 7.04–7.01 (m, 2H), 4.20 (dd, *J* = 12.0, 6.0 Hz, 1H), 3.71 (s, 3H), 3.54 (s, 3H), 2.96 (dd, *J* = 18.0, 6.0 Hz, 1H), 2.78 (dd, *J* = 18.0, 6.0 Hz, 1H) ppm. <sup>13</sup>C NMR (150 MHz, CDCl<sub>3</sub>) δ 170.9, 169.1, 159.4 (d, <sup>1</sup>*J*<sub>CF</sub> = 243 Hz), 133.1 (d, <sup>4</sup>*J* = 3.0 Hz), 121.6 (d, <sup>3</sup>*J*<sub>CF</sub> = 7.5 Hz), 115.7 (d, <sup>2</sup>*J*<sub>CF</sub> = 22.5 Hz), 78.7, 59.2, 52.2, 37.2 ppm; <sup>19</sup>F NMR (376 MHz, CDCl<sub>3</sub>) δ -117.9 ppm; HRMS (ESI) *m/z*: [M + Na]<sup>+</sup> Calcd for C<sub>12</sub>H<sub>14</sub>FNNaO<sub>4</sub> 278.0799; Found 278.0801.

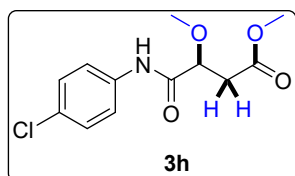

*Methyl 4-((4-chlorophenyl)amino)-3-methoxy-4-oxobutanoate (3h)*

*oxobutanoate (3h)*. Following the general procedure, eluted by petroleum ether/ethyl acetate = 40/1 to 20/1. Yellow oil (38.6 mg, 71%). <sup>1</sup>H NMR (CDCl<sub>3</sub>, 600 MHz) δ 8.44 (s, 1H), 7.54–7.52 (m, 2H), 7.31–7.26 (m, 2H), 4.20 (dd, *J* = 12.0, 6.0 Hz, 1H), 3.72 (s, 3H), 3.54 (s, 3H), 2.96 (dd, *J* = 12.0, 6.0 Hz, 1H), 2.78 (dd, *J* = 12.0, 6.0 Hz, 1H) ppm; <sup>13</sup>C NMR (150 MHz, CDCl<sub>3</sub>) δ 170.9, 169.3, 135.8, 129.7, 129.2, 121.1, 78.8, 59.3, 52.2, 37.2 ppm; HRMS (ESI) *m/z*: [M + Na]<sup>+</sup> Calcd for C<sub>12</sub>H<sub>14</sub>ClNNaO<sub>4</sub> 294.0504; Found 294.0508.

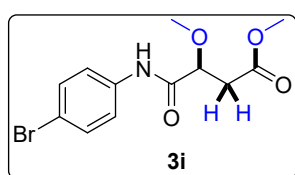

*Methyl 4-((4-bromophenyl)amino)-3-methoxy-4-oxobutanoate (3i)*. Following the general procedure, eluted by petroleum ether/ethyl acetate = 40/1 to 20/1. Brown oil (43.6 mg, 69%). <sup>1</sup>H NMR (CDCl<sub>3</sub>, 600 MHz) δ 8.44 (s, 1H),

7.49–7.47 (m, 2H), 7.45–7.43 (m, 2H), 4.19 (dd, *J* = 12.0, 6.0 Hz, 1H), 3.72 (s, 3H), 3.54 (s, 3H), 2.96 (dd, *J* = 12.0, 6.0 Hz, 1H), 2.79 (dd, *J* = 12.0, 6.0 Hz, 1H) ppm; <sup>13</sup>C NMR (150 MHz, CDCl<sub>3</sub>) δ 170.9, 169.3, 136.3, 132.2, 121.4, 117.4, 78.8, 59.3, 52.2, 37.2 ppm; HRMS (ESI) *m/z*: [M + H]<sup>+</sup> Calcd for C<sub>12</sub>H<sub>15</sub>BrNO<sub>4</sub> 316.0179; Found 316.0174.

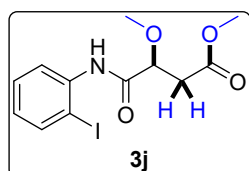

*Methyl 4-((2-iodophenyl)amino)-3-methoxy-4-oxobutanoate (3j)*. Following the general procedure, eluted by petroleum ether/ethyl acetate = 40/1 to 20/1. Brown oil (36.3 mg, 50%). <sup>1</sup>H

NMR (CDCl<sub>3</sub>, 400 MHz) δ 8.95 (s, 1H), 8.30–8.28 (m, 1H), 7.81–7.78 (m, 1H), 7.38–7.33 (m, 1H), 6.88–6.84 (m, 1H), 4.23 (dd, *J* = 8.0, 4.0 Hz, 1H), 3.74 (s, 3H), 3.63 (s, 3H), 2.98 (dd, *J* = 16.0, 4.0 Hz, 1H), 2.78 (dd, *J* = 20.0, 12.0 Hz, 1H) ppm; <sup>13</sup>C NMR (100 MHz, CDCl<sub>3</sub>) δ: 170.9, 169.6, 139.1, 137.7, 129.4, 126.4, 121.6, 89.8, 79.2, 60.0, 52.2, 37.8 ppm; HRMS (ESI) *m/z*: [M + Na]<sup>+</sup> Calcd for C<sub>12</sub>H<sub>14</sub>INNaO<sub>4</sub> 385.9860; Found 385.9860.

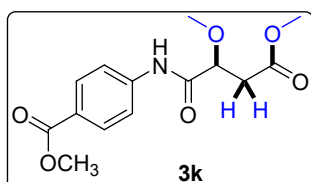

*Methyl 4-(2,4-dimethoxy-4-oxobutanamido)benzoate S10*

**(3k)**. Following the general procedure, eluted by petroleum ether/ethyl acetate = 40/1 to 20/1. Yellow oil (41.3 mg, 70%). <sup>1</sup>H NMR (CDCl<sub>3</sub>, 600 MHz) δ 8.61 (s, 1H), 8.03–8.01 (m, 2H), 7.68–7.65 (m, 2H), 4.21 (dd, *J* = 12.0, 6.0 Hz, 1H), 3.90 (s, 3H), 3.72 (s, 3H), 3.56 (s, 3H), 2.97 (dd, *J* = 12.0, 6.0 Hz, 1H), 2.80 (dd, *J* = 12.0, 6.0 Hz, 1H) ppm; <sup>13</sup>C NMR (150 MHz, CDCl<sub>3</sub>) δ 170.9, 169.6, 166.7, 141.3, 131.0, 126.1, 119.0, 78.8, 59.3, 52.2, 52.1, 37.1 ppm; HRMS (ESI) *m/z*: [M + Na]<sup>+</sup> Calcd for C<sub>14</sub>H<sub>17</sub>INNaO<sub>6</sub> 318.0948; Found 318.0950.

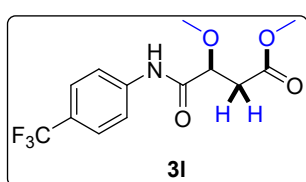

*Methyl* *3-methoxy-4-oxo-4-((4-(trifluoromethyl)phenyl)amino)butanoate* (**3l**). Following the general procedure, eluted by petroleum ether/ethyl acetate = 40/1 to 20/1. Brown oil (42.1 mg, 69%). <sup>1</sup>H NMR

(CDCl<sub>3</sub>, 600 MHz) δ 8.60 (s, 1H), 7.72–7.70 (m, 2H), 7.60–7.59 (m, 2H), 4.22 (dd, *J* = 12.0, 6.0 Hz, 1H), 3.72 (s, 3H), 3.56 (s, 3H), 2.98 (dd, *J* = 12.0, 6.0 Hz, 1H), 2.82 (dd, *J* = 12.0, 6.0 Hz, 1H) ppm; <sup>13</sup>C NMR (150 MHz, CDCl<sub>3</sub>) δ 170.8, 169.7, 140.2, 126.5 (q, *J* = 3.0 Hz), 125.1, 124.0 (q, *J*<sub>CF</sub> = 270.0 Hz), 119.4, 78.8, 59.3, 52.2, 37.1 ppm; <sup>19</sup>F NMR (376 MHz, CDCl<sub>3</sub>) δ -62.2 ppm; HRMS (ESI) *m/z*: [M + Na]<sup>+</sup> Calcd for C<sub>13</sub>H<sub>14</sub>F<sub>3</sub>NNaO<sub>4</sub> 328.0767; Found 328.0771.

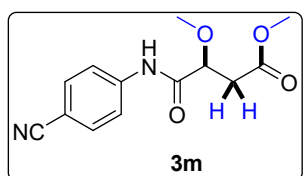

*Methyl* *(S)-4-((4-cyanophenyl)amino)-3-methoxy-4-oxobutanoate* (**3m**). Following the general procedure, eluted by petroleum ether/ethyl acetate = 40/1 to 20/1. Yellow oil (31.5 mg, 67%). <sup>1</sup>H NMR (400 MHz, CDCl<sub>3</sub>) δ

8.66 (s, 1H), 7.77–7.69 (m, 2H), 7.65 – 7.58 (m, 2H), 4.20 (dd, *J* = 6.8, 4.2 Hz, 1H), 3.72 (s, 3H), 3.56 (s, 3H), 2.97 (dd, *J* = 16.5, 4.2 Hz, 1H), 2.83 (dd, *J* = 16.5, 6.8 Hz, 1H) ppm; <sup>13</sup>C NMR (100 MHz, CDCl<sub>3</sub>) δ 170.6, 169.7, 141.1, 133.4, 119.7, 118.8, 107.6, 78.6, 59.1, 52.1, 36.7 ppm; HRMS (ESI) *m/z*: [M + H]<sup>+</sup> Calcd for C<sub>13</sub>H<sub>15</sub>N<sub>2</sub>O<sub>4</sub> 263.1026; Found 263.1029.

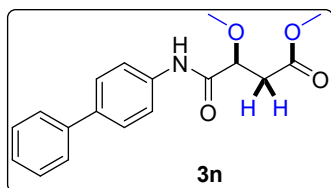

*Methyl 4-([1,1'-biphenyl]-4-ylamino)-3-methoxy-4-oxobutanoate (3n)*. Following the general procedure, eluted by petroleum ether/ethyl acetate = 40/1 to 20/1.

Yellow solid (47.6 mg, 76%), m.p. 114.3-114.8 °C. <sup>1</sup>H NMR (CDCl<sub>3</sub>, 400 MHz) δ 8.49 (s, 1H), 7.67–7.65 (m, 2H), 7.59–7.56 (m, 4H), 7.45–7.41 (m, 2H), 7.35–7.31 (m, 1H), 4.23 (dd, *J* = 8.0, 4.0 Hz, 1H), 3.74 (s, 3H), 3.57 (s, 3H), 2.99 (dd, *J* = 8.0, 4.0 Hz, 1H), 2.80 (dd, *J* = 8.0, 4.0 Hz, 1H) ppm; <sup>13</sup>C NMR (100 MHz, CDCl<sub>3</sub>) δ 171.0, 169.3, 140.6, 137.7, 136.5, 128.9, 127.8, 127.3, 127.0, 120.2, 79.0, 59.3, 52.2, 37.5 ppm; HRMS (ESI) *m/z*: [M + Na]<sup>+</sup> Calcd for C<sub>18</sub>H<sub>19</sub>NNaO<sub>4</sub> 336.1206; Found 336.1208.

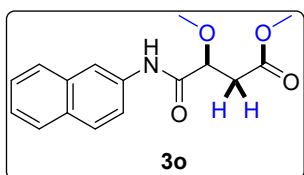

*Methyl 3-methoxy-4-(naphthalen-2-ylamino)-4-oxobutanoate (3o)*. Following the general procedure, eluted by petroleum ether/ethyl acetate = 40/1 to 20/1. Yellow solid (41.9 mg, 73%), m.p. 134.8-135.2 °C. <sup>1</sup>H NMR

(CDCl<sub>3</sub>, 600 MHz) δ 8.59 (s, 1H), 8.28–8.27 (m, 1H), 7.82–7.78 (m, 3H), 7.53–7.51 (m, 1H), 7.48–7.40 (m, 2H), 4.27 (dd, *J* = 12.0, 6.0 Hz, 1H), 3.74 (s, 3H), 3.59 (s, 3H), 3.02 (dd, *J* = 12.0, 6.0 Hz, 1H), 2.83 (dd, *J* = 12.0, 6.0 Hz, 1H) ppm; <sup>13</sup>C NMR (150 MHz, CDCl<sub>3</sub>) δ 171.1, 169.4, 134.6, 133.9, 130.9, 129.0, 127.8, 127.7, 126.7, 125.3, 119.8, 116.7, 79.0, 59.4, 52.2, 37.5 ppm; HRMS (ESI) *m/z*: [M + Na]<sup>+</sup> Calcd for C<sub>16</sub>H<sub>17</sub>NNaO<sub>4</sub> 310.1050; Found 310.1057.

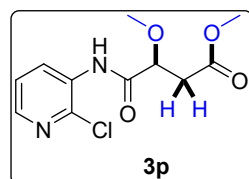

*Methyl 4-((2-chloropyridin-3-yl)amino)-3-methoxy-4-oxobutanoate (3p)*. Following the general procedure, eluted by petroleum ether/ethyl acetate = 40/1 to 20/1. White solid (37.1 mg, 68%), m.p. 89.4-89.6 °C. <sup>1</sup>H NMR (CDCl<sub>3</sub>, 600 MHz) δ

9.04 (s, 1H), 8.69–8.67 (m, 1H), 8.08–8.06 (m, 1H), 7.23–7.20 (m, 1H), 4.19 (dd, *J* =

12.0, 6.0 Hz, 1H), 3.67 (s, 3H), 3.55 (s, 3H), 2.91 (dd,  $J = 18.0, 6.0$  Hz, 1H), 2.77 (dd,  $J = 12.0, 6.0$  Hz, 1H) ppm;  $^{13}\text{C}$  NMR (150 MHz,  $\text{CDCl}_3$ )  $\delta$  170.5, 170.1, 144.2, 140.3, 131.2, 128.6, 123.3, 78.7, 59.4, 52.1, 37.1 ppm; HRMS (ESI)  $m/z$ :  $[\text{M} + \text{H}]^+$  Calcd for  $\text{C}_{11}\text{H}_{14}\text{ClN}_2\text{O}_4$  273.0637; Found 273.0641.

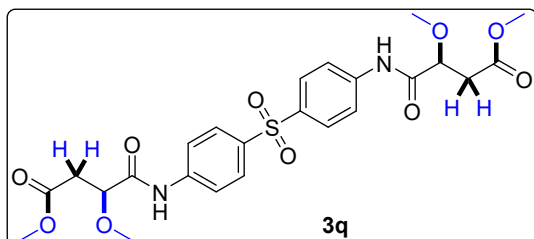

*Dimethyl 4,4'-((sulfonylbis(4,1-phenylene))bis(azanediyl))bis(3-methoxy-4-oxobutanoate) (3q).* Following the general procedure, eluted by petroleum ether/ethyl acetate = 40/1 to 20/1. Yellow oil (69.8 mg, 65%).  $^1\text{H}$  NMR ( $\text{CDCl}_3$ , 600 MHz)  $\delta$  8.67 (s, 2H), 7.87–7.85 (m, 4H), 7.72–7.70 (m, 4H), 4.18 (dd,  $J = 12.0, 6.0$  Hz, 2H), 3.69 (s, 6H), 3.52 (s, 6H), 2.93 (dd,  $J = 18.0, 6.0$  Hz, 2H), 2.79 (dd,  $J = 12.0, 6.0$  Hz, 2H) ppm;  $^{13}\text{C}$  NMR (150 MHz,  $\text{CDCl}_3$ )  $\delta$  170.7, 169.8, 141.5, 137.0, 129.0, 119.8, 78.6, 59.2, 52.2, 36.9 ppm; HRMS (ESI)  $m/z$ :  $[\text{M} + \text{H}]^+$  Calcd for  $\text{C}_{24}\text{H}_{29}\text{N}_2\text{O}_{10}\text{S}$  537.1537; Found 537.1541.

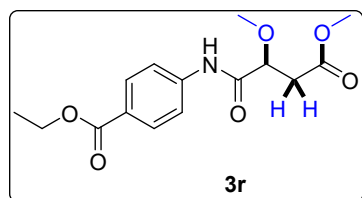

*Ethyl 4-(2,4-dimethoxy-4-oxobutanamido)benzoate (3r).* Following the general procedure, eluted by petroleum ether/ethyl acetate = 40/1 to 20/1. Yellow oil (43.9 mg, 71%).  $^1\text{H}$  NMR ( $\text{CDCl}_3$ , 600 MHz)  $\delta$  8.61 (s, 1H), 8.02–8.01 (m, 2H), 7.67–7.65 (m, 2H), 4.35 (d,  $J = 6.0$  Hz, 2H), 4.21 (dd,  $J = 12.0, 6.0$  Hz, 1H), 3.71 (s, 3H), 3.55 (s, 3H), 2.96 (dd,  $J = 18.0, 6.0$  Hz, 1H), 2.80 (dd,  $J = 18.0, 6.0$  Hz, 1H), 1.38 (t,  $J = 6.0$  Hz, 3H) ppm;  $^{13}\text{C}$  NMR (150 MHz,  $\text{CDCl}_3$ )  $\delta$  170.9, 169.6, 166.2, 141.2, 130.9, 126.5, 119.0, 78.8, 61.0, 59.3, 52.2, 37.1, 14.5 ppm; HRMS (ESI)  $m/z$ :  $[\text{M} + \text{H}]^+$  Calcd for  $\text{C}_{15}\text{H}_{20}\text{NO}_6$  310.1285; Found 310.1292.

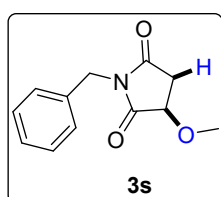

*1-Benzyl-3-methoxypyrrolidine-2,5-dione (3s).* Following the general procedure, eluted by petroleum ether/ethyl acetate = 40/1 to 20/1. Colourless oil (34.2 mg, 78%).  $^1\text{H}$  NMR ( $\text{CDCl}_3$ , 600

MHz)  $\delta$  7.37–7.36 (m, 2H), 7.32–7.27 (m, 3H), 4.65 (d,  $J = 6.0$  Hz, 2H), 4.20 (dd,  $J = 12.0, 6.0$  Hz, 1H), 3.60 (s, 3H), 2.99 (dd,  $J = 18.0, 12.0$  Hz, 1H), 2.62 (dd,  $J = 18.0, 6.0$  Hz, 1H) ppm;  $^{13}\text{C}$  NMR (150 MHz,  $\text{CDCl}_3$ )  $\delta$  175.4, 173.9, 135.5, 128.9, 128.8, 128.2, 74.9, 59.0, 42.4, 36.1 ppm; HRMS (ESI)  $m/z$ :  $[\text{M} + \text{Na}]^+$  Calcd for  $\text{C}_{12}\text{H}_{13}\text{NNaO}_3$  242.0788; Found 242.0788.

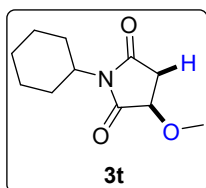

*1-Cyclohexyl-3-methoxypyrrolidine-2,5-dione (3t)*. Following the general procedure, eluted by petroleum ether/ethyl acetate = 40/1 to 20/1. Colourless oil (39.5 mg, 72%).  $^1\text{H}$  NMR ( $\text{CDCl}_3$ , 400 MHz)  $\delta$  4.11 (dd,  $J = 8.0, 4.0$  Hz, 1H), 3.99–3.89 (m, 1H), 3.58 (s, 3H), 2.92 (dd,  $J = 16.0, 8.0$  Hz, 1H), 2.55 (dd,  $J = 20.0, 8.0$  Hz, 1H), 2.15–2.05 (m, 2H), 1.83–1.79 (m, 2H), 1.66–1.55 (m, 3H), 1.34–1.17 (m, 3H) ppm;  $^{13}\text{C}$  NMR (100 MHz,  $\text{CDCl}_3$ )  $\delta$ : 175.9, 174.2, 74.5, 58.9, 51.8, 35.9, 28.9, 28.7, 25.9, 25.1 ppm; HRMS (ESI)  $m/z$ :  $[\text{M} + \text{Na}]^+$  Calcd for  $\text{C}_{11}\text{H}_{17}\text{NNaO}_3$  234.1101; Found 234.1102.

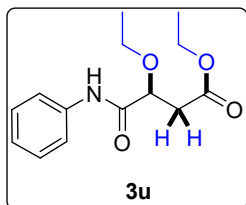

*Ethyl 3-ethoxy-4-oxo-4-(phenylamino)butanoate (3u)*. Following the general procedure, eluted by petroleum ether/ethyl acetate = 40/1 to 20/1. Brown oil (36.1 mg, 68%).  $^1\text{H}$  NMR ( $\text{CDCl}_3$ , 400 MHz)  $\delta$  8.48 (s, 1H), 7.58–7.55 (m, 2H), 7.36–7.31 (m, 2H), 7.15–7.11 (m, 1H), 4.29 (dd,  $J = 8.0, 4.0$  Hz, 1H), 4.18 (q,  $J = 8.0$  Hz, 2H), 3.77–3.67 (m, 2H), 2.95 (dd,  $J = 16.0, 4.0$  Hz, 1H), 2.74 (dd,  $J = 16.0, 4.0$  Hz, 1H), 1.29 (t,  $J = 8.0$  Hz, 3H), 1.25 (t,  $J = 8.0$  Hz, 3H) ppm;  $^{13}\text{C}$  NMR (100 MHz,  $\text{CDCl}_3$ )  $\delta$  170.6, 169.7, 137.2, 129.2, 124.7, 119.8, 77.3, 67.5, 61.0, 38.3, 15.5, 14.3 ppm; HRMS (ESI)  $m/z$ :  $[\text{M} + \text{Na}]^+$  Calcd for  $\text{C}_{14}\text{H}_{19}\text{NNaO}_4$  288.1206; Found 288.1212.

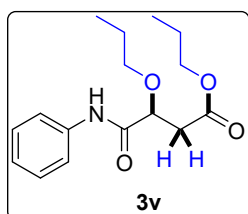

*Propyl 4-oxo-4-(phenylamino)-3-propoxybutanoate (3v)*. Following the general procedure, eluted by petroleum ether/ethyl acetate = 40/1 to 20/1. Yellow oil (35.8 mg, 61%).

$^1\text{H}$  NMR ( $\text{CDCl}_3$ , 600 MHz)  $\delta$  8.48 (s, 1H), 7.57–7.56 (m, 2H), 7.36–7.33 (m, 2H), 7.14–7.12 (m, 1H), 4.29 (dd,  $J = 12.0, 6.0$  Hz, 1H), 4.11–4.04 (m, 2H), 3.67–3.56 (m, 2H), 2.96 (dd,  $J = 18.0, 6.0$  Hz, 1H), 2.75 (dd,  $J = 18.0, 6.0$  Hz, 1H), 1.70–1.62 (m, 4H), 0.99 (t,  $J = 6.0$  Hz, 3H), 0.93 (t,  $J = 6.0$  Hz, 3H) ppm;  $^{13}\text{C}$  NMR (150 MHz,  $\text{CDCl}_3$ )  $\delta$  170.7, 169.8, 137.3, 129.2, 124.7, 119.7, 77.5, 73.7, 66.6, 38.3, 23.1, 22.1, 10.8, 10.5 ppm; HRMS (ESI)  $m/z$ :  $[\text{M} + \text{Na}]^+$  Calcd for  $\text{C}_{16}\text{H}_{23}\text{NNaO}_4$  316.1519; Found 316.1519.

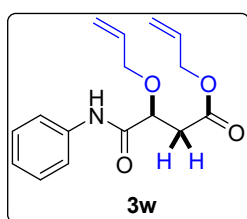

*Allyl 3-(allyloxy)-4-oxo-4-(phenylamino)butanoate (3w).*

Following the general procedure, eluted by petroleum ether/ethyl acetate = 40/1 to 20/1. Yellow oil (40.5 mg, 70%).

$^1\text{H}$  NMR ( $\text{CDCl}_3$ , 600 MHz)  $\delta$  8.47 (s, 1H), 7.56–7.55 (m, 2H), 7.35–7.32 (m, 2H), 7.15–7.12 (m, 1H), 5.98–5.87 (m, 2H), 5.38–5.22 (m, 4H), 4.63–4.62 (m, 2H), 4.37 (dd,  $J = 12.0, 6.0$  Hz, 1H), 4.26–4.15 (m, 2H), 3.00 (dd,  $J = 18.0, 6.0$  Hz, 1H), 2.82 (dd,  $J = 18.0, 12.0$  Hz, 1H) ppm;  $^{13}\text{C}$  NMR (150 MHz,  $\text{CDCl}_3$ )  $\delta$  170.2, 169.4, 137.2, 133.4, 131.9, 129.2, 124.8, 119.8, 118.9, 118.7, 76.6, 72.7, 65.7, 38.1 ppm; HRMS (ESI)  $m/z$ :  $[\text{M} + \text{Na}]^+$  Calcd for  $\text{C}_{16}\text{H}_{19}\text{NNaO}_4$  312.1206; Found 312.1206.

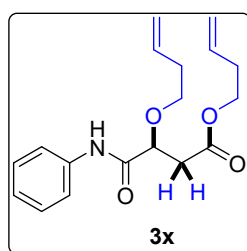

*But-3-en-1-yl 3-(but-3-en-1-yloxy)-4-oxo-4-(phenylamino)butanoate (3x).*

Following the general procedure, eluted by petroleum ether/ethyl acetate = 40/1 to 20/1. Brown oil (37.5 mg, 59%).  $^1\text{H}$  NMR ( $\text{CDCl}_3$ , 600 MHz)  $\delta$  8.54 (s, 1H), 7.56–7.55 (m, 2H), 7.35–7.32 (m, 2H), 7.14–7.11 (m, 1H), 5.90–5.74 (m, 2H), 5.23–5.05 (m, 4H), 4.30 (dd,  $J = 12.0, 6.0$  Hz, 1H), 4.20–4.16 (m, 2H), 3.85–3.81 (m, 1H), 3.65–3.62 (m, 1H), 2.98 (dd,  $J = 18.0, 6.0$  Hz, 1H), 2.74 (dd,  $J = 18.0, 12.0$  Hz, 1H), 2.43–2.37 (m, 4H) ppm;  $^{13}\text{C}$  NMR (150 MHz,  $\text{CDCl}_3$ )  $\delta$  170.7, 169.5, 137.3, 135.3, 134.0, 129.2, 124.7, 119.7, 118.0, 117.5, 71.2, 64.1, 38.2, 34.3, 33.1 ppm; HRMS (ESI)  $m/z$ :  $[\text{M} + \text{H}]^+$  Calcd for  $\text{C}_{18}\text{H}_{24}\text{NO}_4$  318.1700; Found 318.1698.

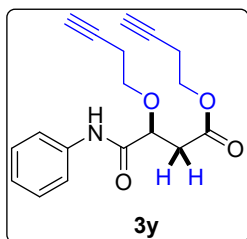

*But-3-yn-1-yl*

*3-(but-3-yn-1-yloxy)-4-oxo-4-*

*(phenylamino)butanoate (3y)*. Following the general procedure,

eluted by petroleum ether/ethyl acetate = 40/1 to 20/1. Brown oil (40.1 mg, 64%). <sup>1</sup>H NMR (CDCl<sub>3</sub>, 600 MHz) δ 8.72 (s, 1H), 7.52–7.51 (m, 2H), 7.28–7.26 (m, 2H), 7.08–7.05 (m, 1H), 4.30

(dd, *J* = 12.0, 6.0 Hz, 1H), 4.18 (t, *J* = 12.0 Hz, 2H), 3.85–3.82 (m, 1H), 3.68–3.65 (m, 1H), 2.99 (dd, *J* = 18.0, 6.0 Hz, 1H), 2.72 (dd, *J* = 18.0, 6.0 Hz, 1H), 2.56–2.42 (m, 4H), 2.05 (t, *J* = 6.0 Hz, 1H), 1.93 (t, *J* = 6.0 Hz, 1H) ppm; <sup>13</sup>C NMR (150 MHz, CDCl<sub>3</sub>) δ 170.4, 169.2, 137.2, 129.2, 124.8, 120.0, 82.0, 80.1, 70.3, 70.2, 70.0, 62.7, 38.2, 20.3, 19.1 ppm; HRMS (ESI) *m/z*: [M + H]<sup>+</sup> Calcd for C<sub>18</sub>H<sub>20</sub>NO<sub>4</sub> 314.1387; Found 314.1389.

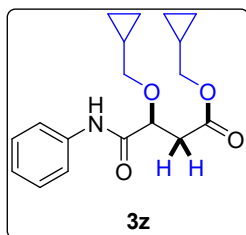

*Cyclopropylmethyl*

*3-(cyclopropylmethoxy)-4-oxo-4-*

*(phenylamino)butanoate (3z)*. Following the general procedure,

eluted by petroleum ether/ethyl acetate = 40/1 to 20/1. Brown oil (35.5 mg, 56%). <sup>1</sup>H NMR (CDCl<sub>3</sub>, 600 MHz) δ 8.61 (s, 1H), 7.58–7.57 (m, 2H), 7.34–7.26 (m, 2H), 7.13–7.11 (m, 1H),

4.35–4.33 (m, 1H), 3.95 (d, *J* = 6.0 Hz, 2H), 3.60–3.57 (m, 1H), 3.45–3.42 (m, 1H), 2.99 (dd, *J* = 18.0, 6.0 Hz, 1H), 2.76 (dd, *J* = 18.0, 6.0 Hz, 1H), 1.15–1.09 (m, 2H), 0.63–0.52 (m, 4H), 0.27–0.25 (m, 4H) ppm; <sup>13</sup>C NMR (150 MHz, CDCl<sub>3</sub>) δ 170.7, 169.8, 137.3, 129.2, 124.6, 119.6, 77.2, 77.0, 69.8, 38.4, 10.9, 9.8, 3.6, 3.4, 3.3, 3.01 ppm; HRMS (ESI) *m/z*: [M + H]<sup>+</sup> Calcd for C<sub>18</sub>H<sub>24</sub>NO<sub>4</sub> 318.1700; Found 318.1702.

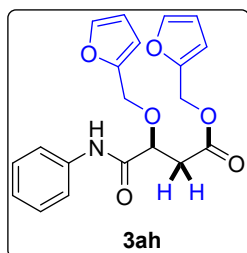

*Furan-2-ylmethyl*

*3-(furan-2-ylmethoxy)-4-oxo-4-*

*(phenylamino)butanoate (3ah)*. Following the general procedure,

eluted by petroleum ether/ethyl acetate = 40/1 to 20/1. Brown oil (33.2 mg, 45%). <sup>1</sup>H NMR (CDCl<sub>3</sub>, 600 MHz) δ 8.49 (s, 1H), 7.51–7.50 (m, 2H), 7.41–7.40 (m, 2H), 7.33–7.30 (m, 2H),



7.12–7.10 (m, 1H), 6.43–6.33 (m, 4H), 5.13 (q,  $J = 12.0$  Hz, 2H), 4.75 (d,  $J = 12.0$  Hz, 1H), 4.55 (d,  $J = 12.0$  Hz, 1H), 4.44 (dd,  $J = 12.0, 6.0$  Hz, 1H), 3.05 (dd,  $J = 18.0, 6.0$  Hz, 1H), 2.78 (dd,  $J = 12.0, 6.0$  Hz, 1H) ppm;  $^{13}\text{C}$  NMR (150 MHz,  $\text{CDCl}_3$ )  $\delta$  170.4, 169.1, 150.4, 149.2, 143.8, 143.45, 137.3, 129.1, 124.7, 119.8, 111.1, 110.9, 110.8, 110.7, 76.6, 65.8, 58.6, 38.2 ppm; HRMS (ESI)  $m/z$ :  $[\text{M} + \text{Na}]^+$  Calcd for  $\text{C}_{20}\text{H}_{19}\text{NNaO}_6$  392.1105; Found 392.1105.

**Copies of  $^1\text{H}$  NMR,  $^{13}\text{C}$  NMR and  $^{19}\text{F}$  NMR spectra for Products 3a-ah**

*Methyl 3-methoxy-4-oxo-4-(phenylamino)butanoate (3a)*

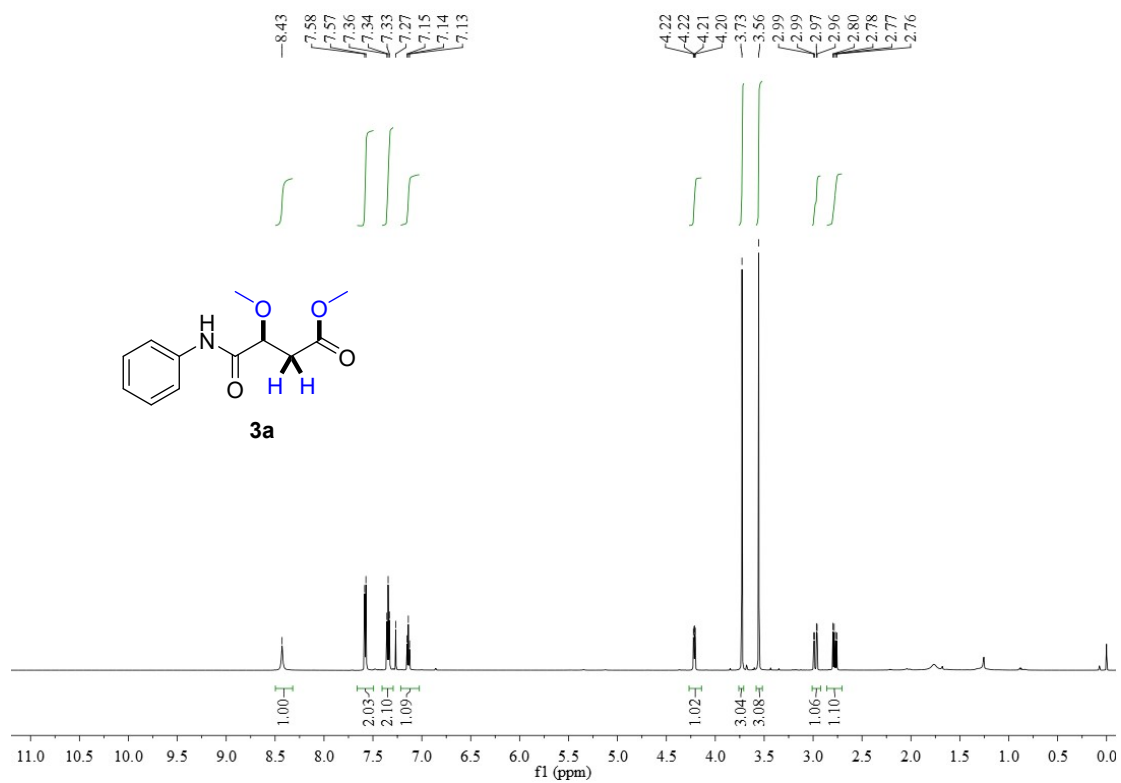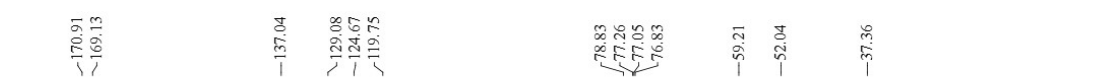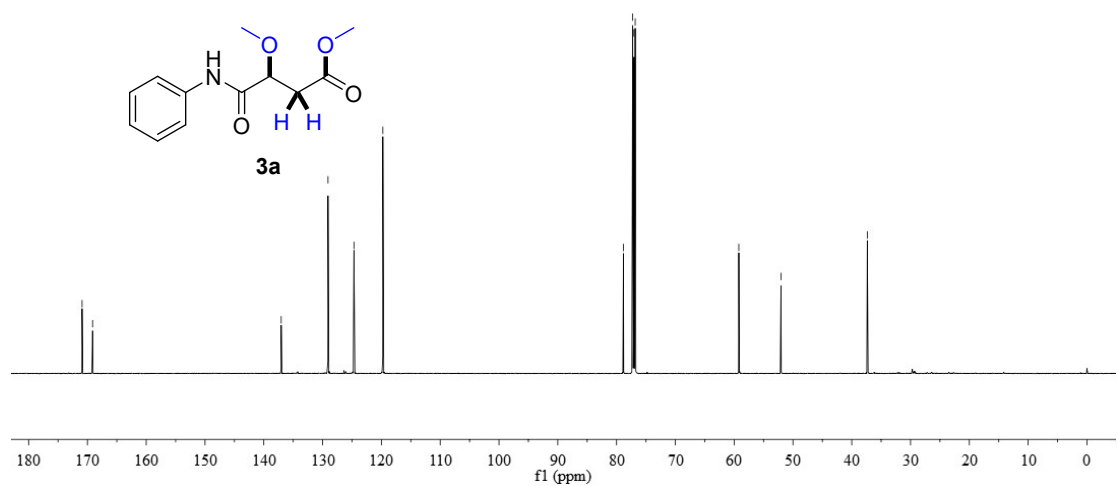

Methyl 3-methoxy-4-oxo-4-(*m*-tolylamino)butanoate (**3b**)

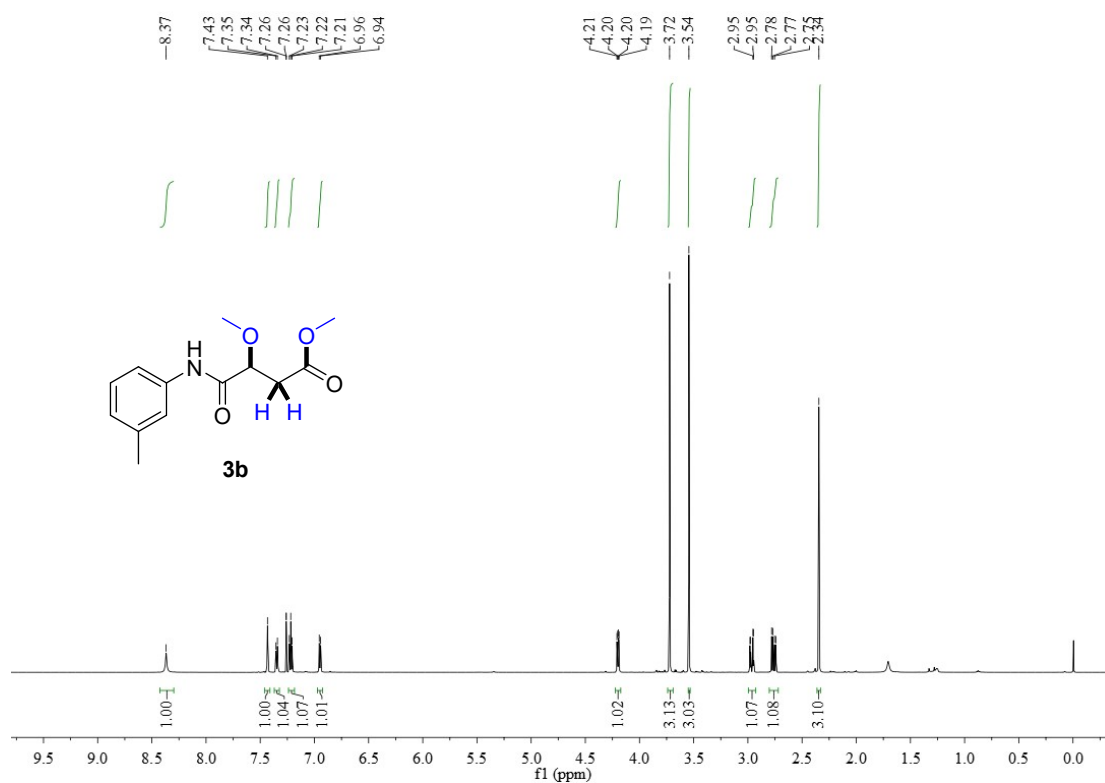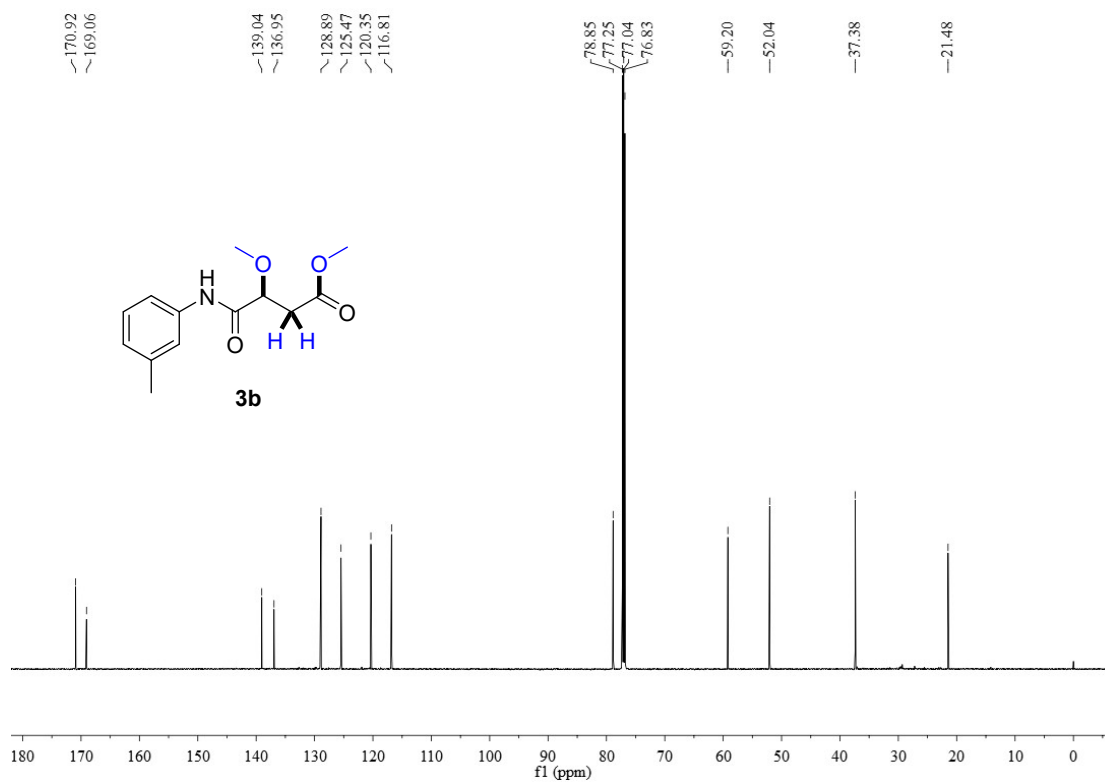

Methyl 4-((2,4-dimethylphenyl)amino)-3-methoxy-4-oxobutanoate (**3c**)

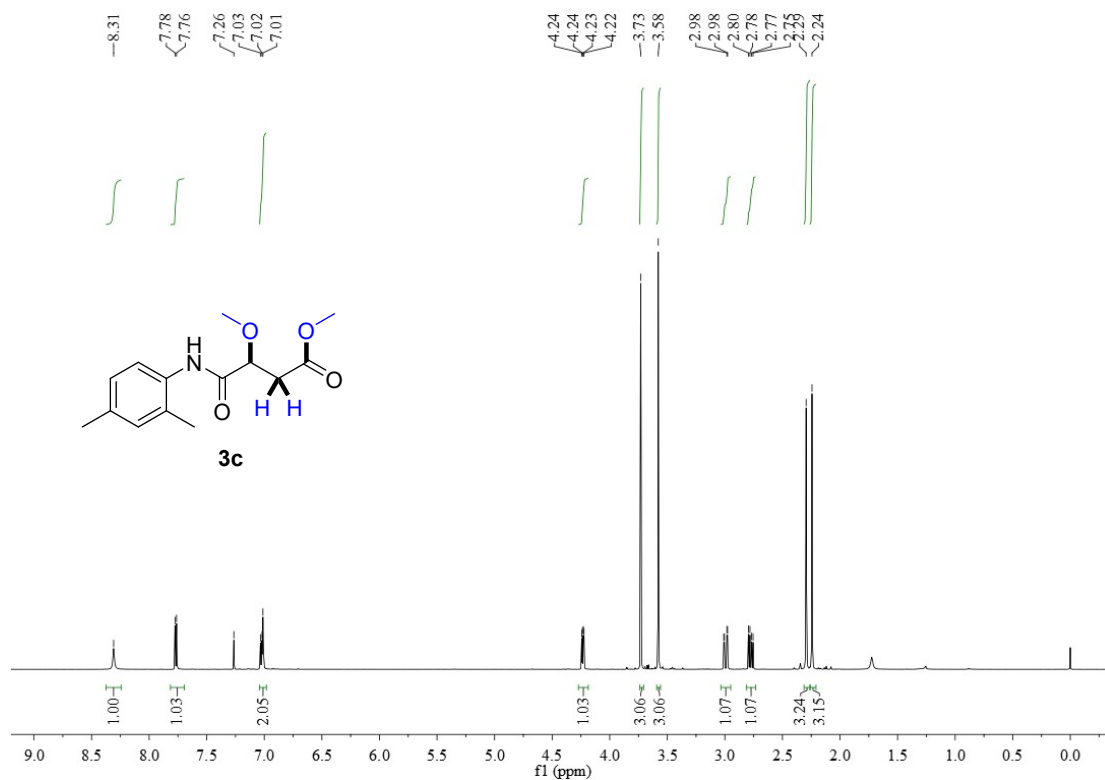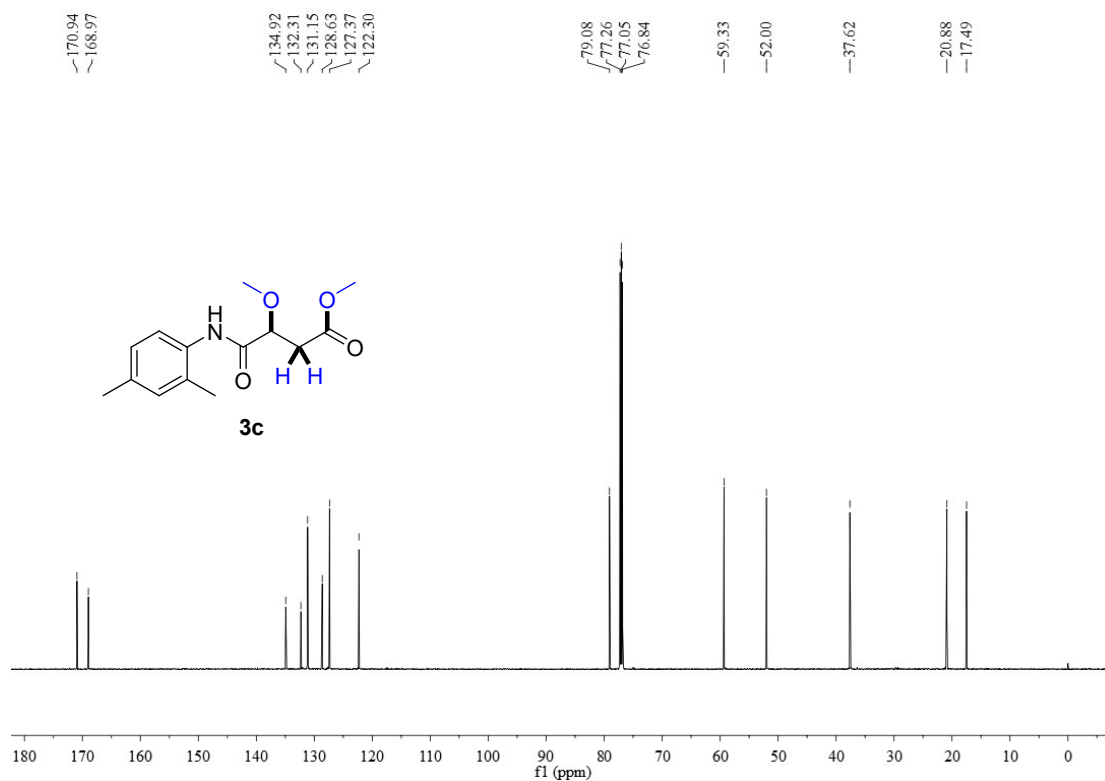

Methyl 4-((4-isopropylphenyl)amino)-3-methoxy-4-oxobutanoate (**3d**)

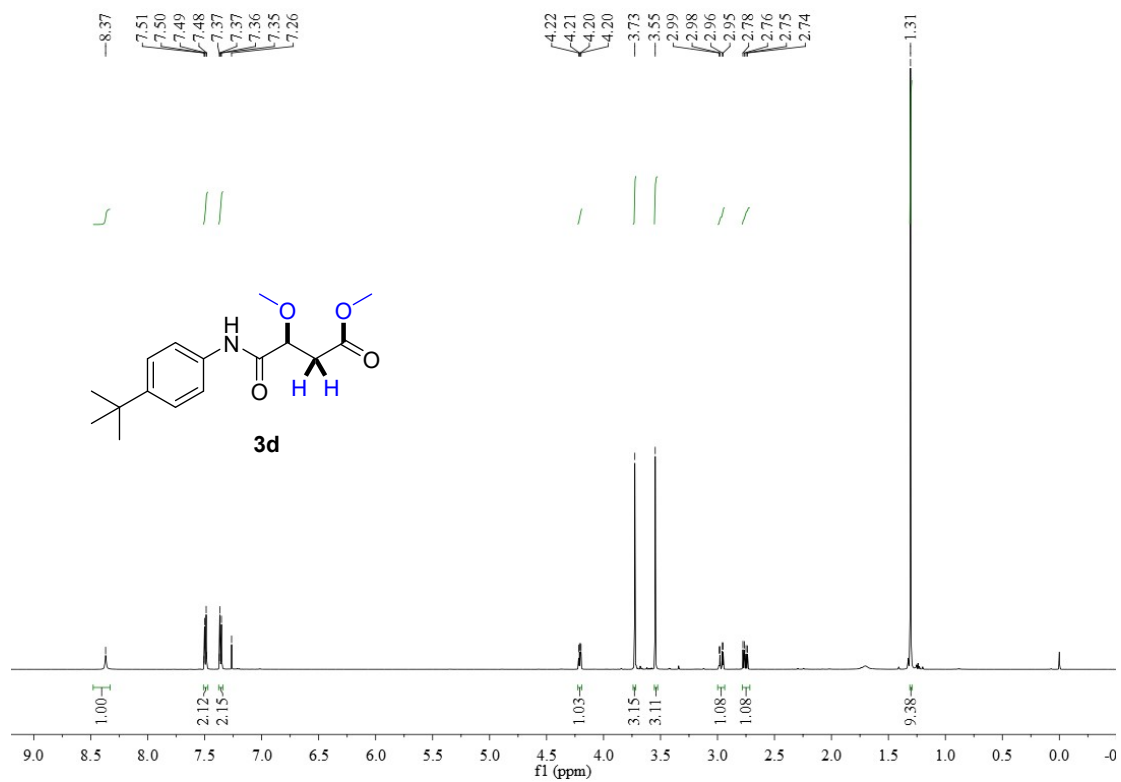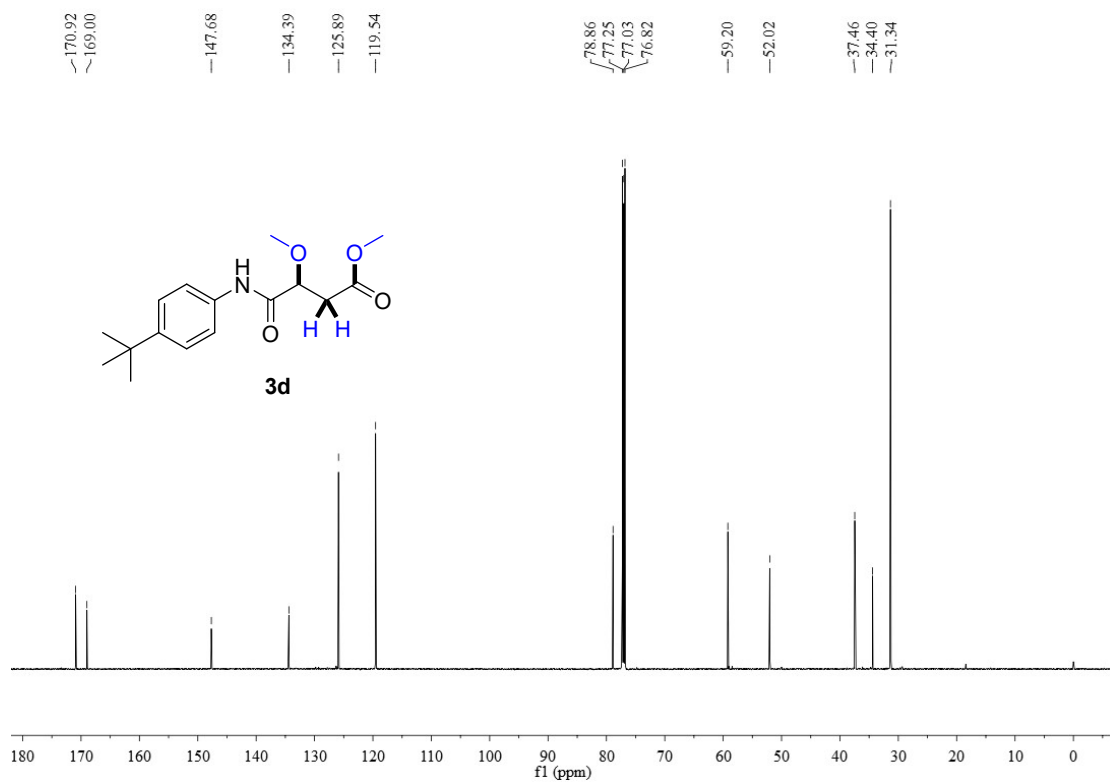

Methyl 3-methoxy-4-((4-methoxyphenyl)amino)-4-oxobutanoate (**3e**)

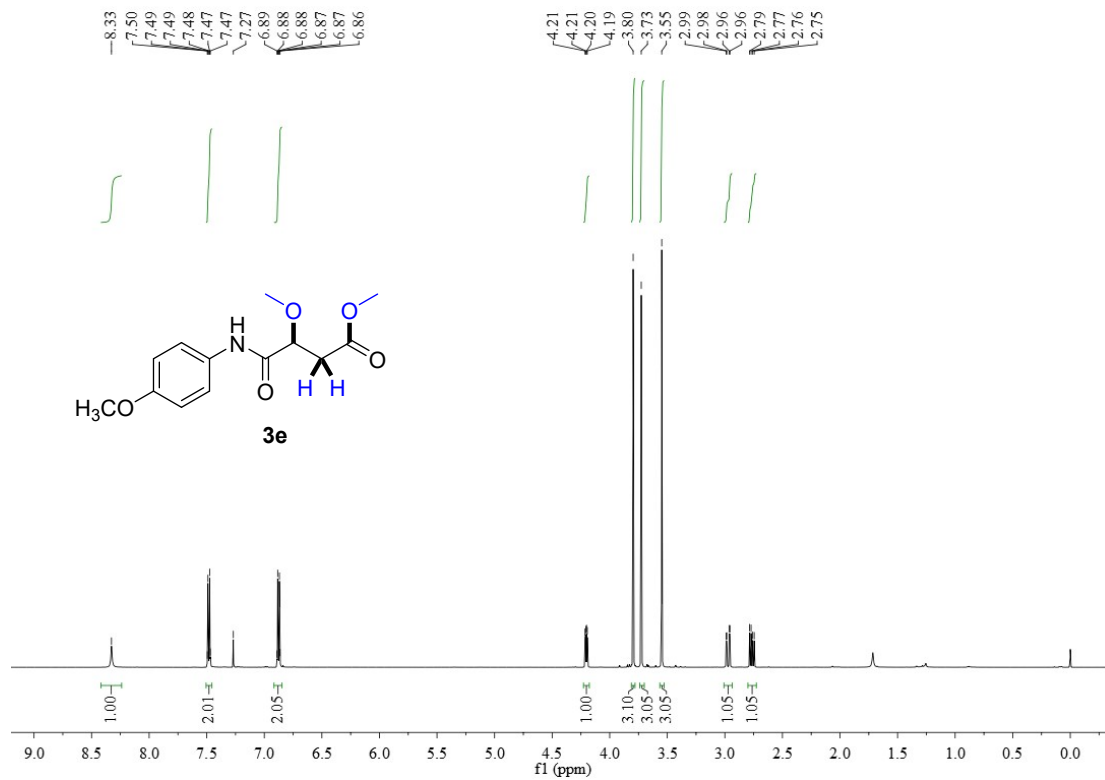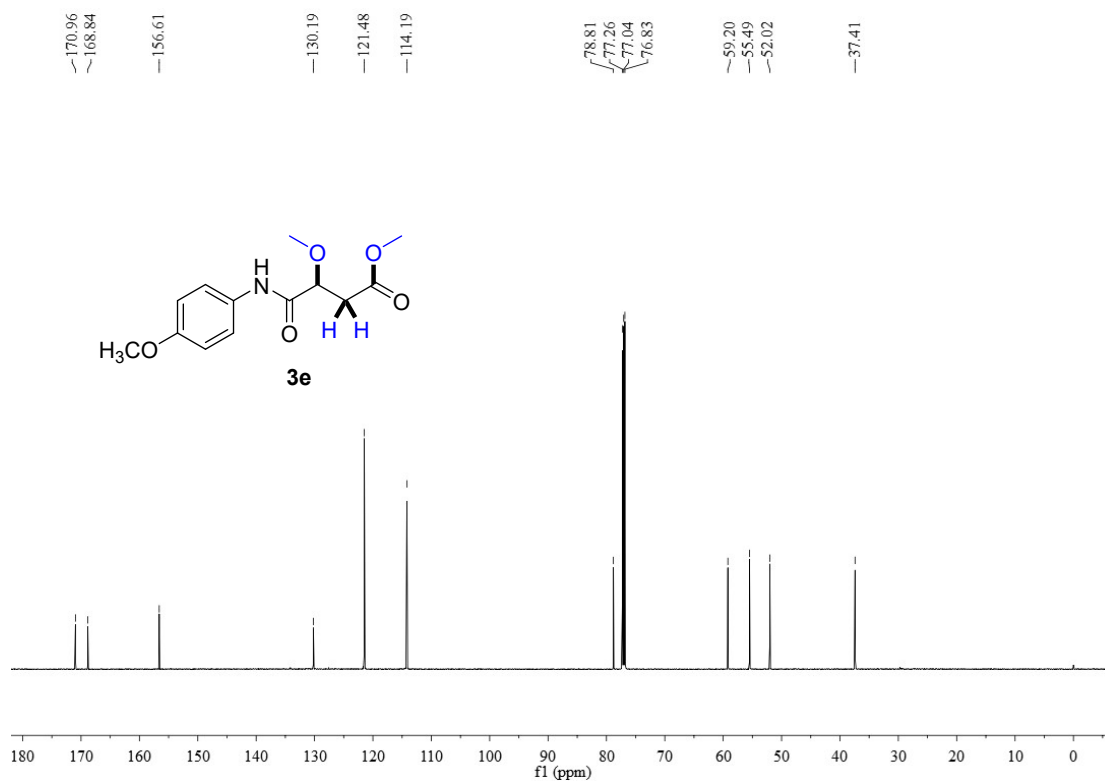

Methyl 3-methoxy-4-oxo-4-((4-(piperidin-1-yl)phenyl)amino)butanoate (**3f**)

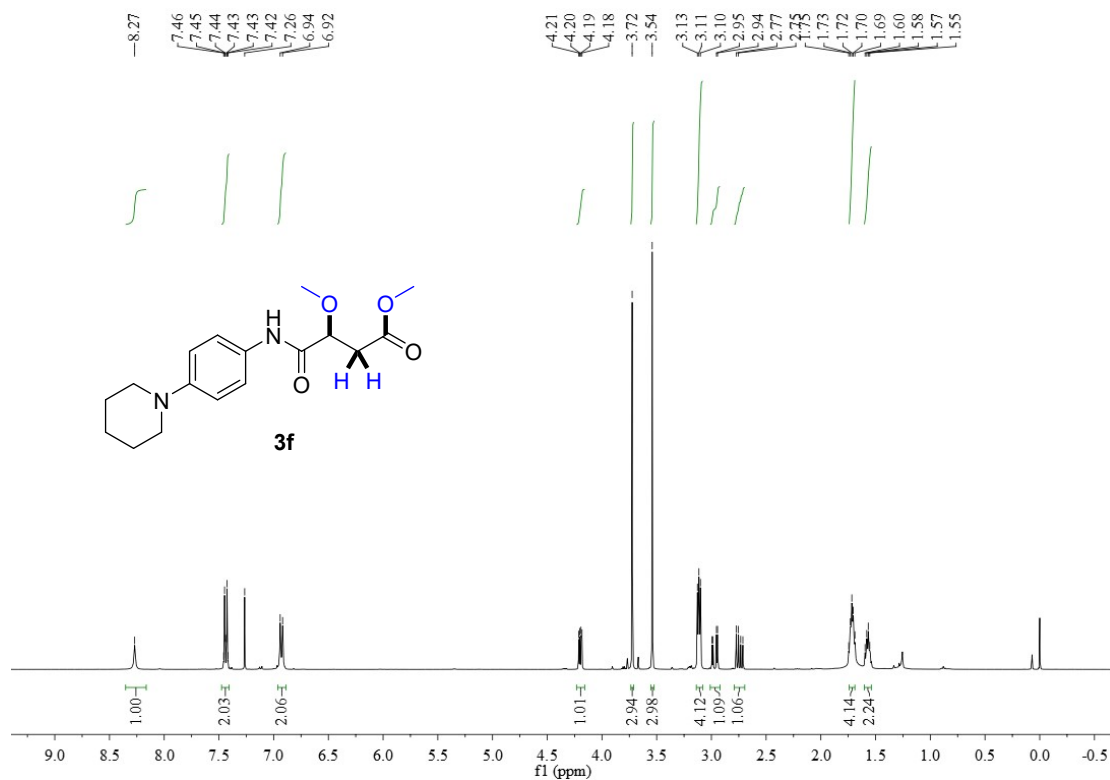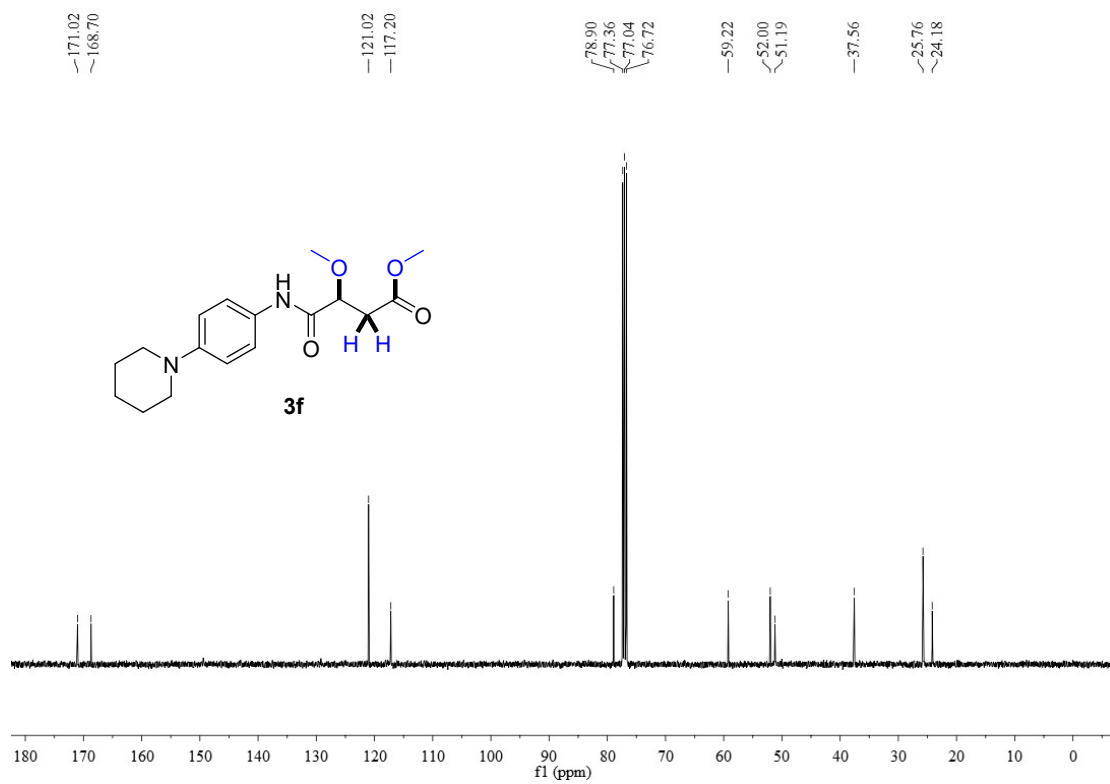

Methyl 4-((4-fluorophenyl)amino)-3-methoxy-4-oxobutanoate (**3g**)

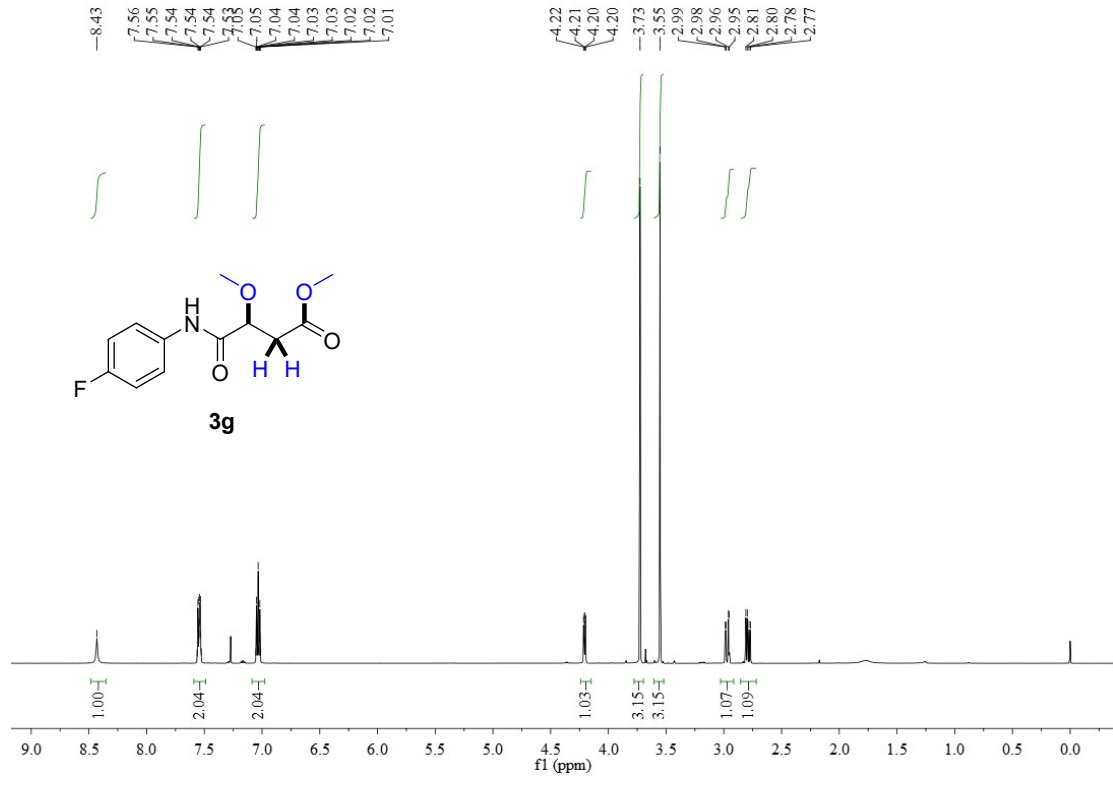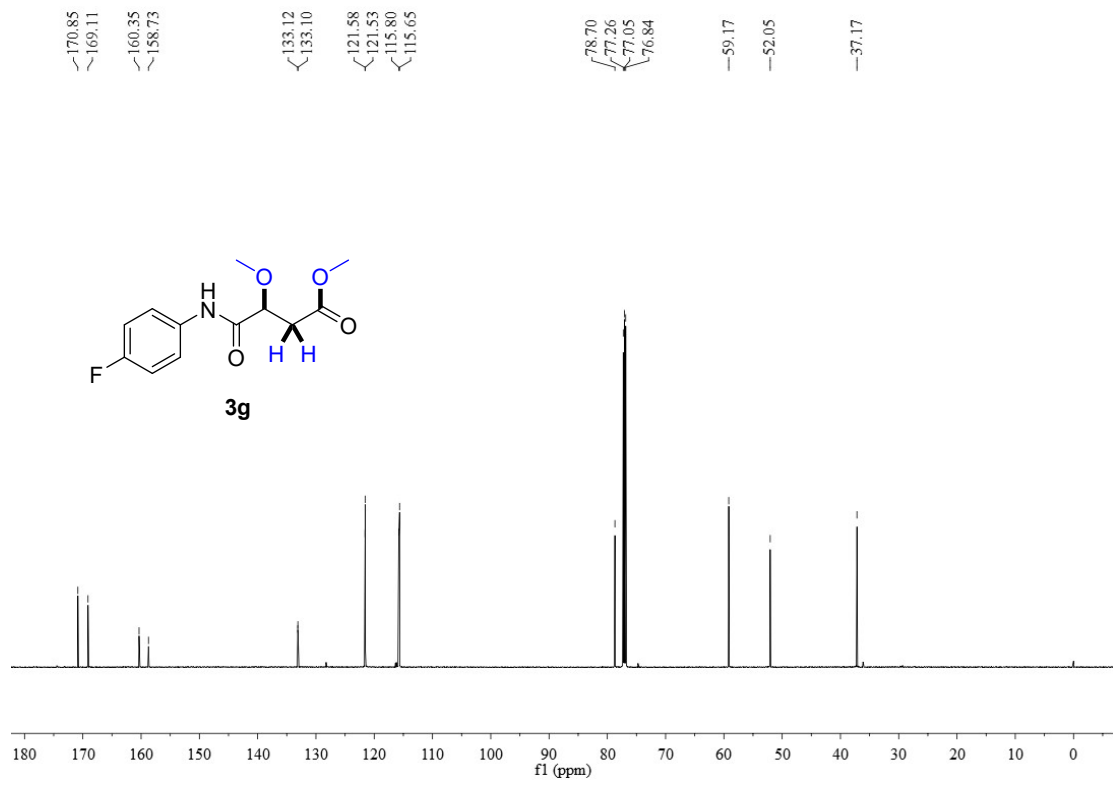



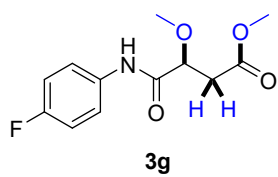

--117.89

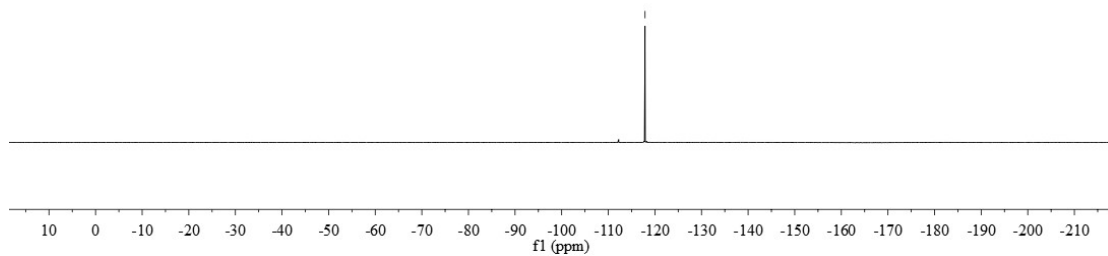

Methyl 4-((4-chlorophenyl)amino)-3-methoxy-4-oxobutanoate (**3h**)

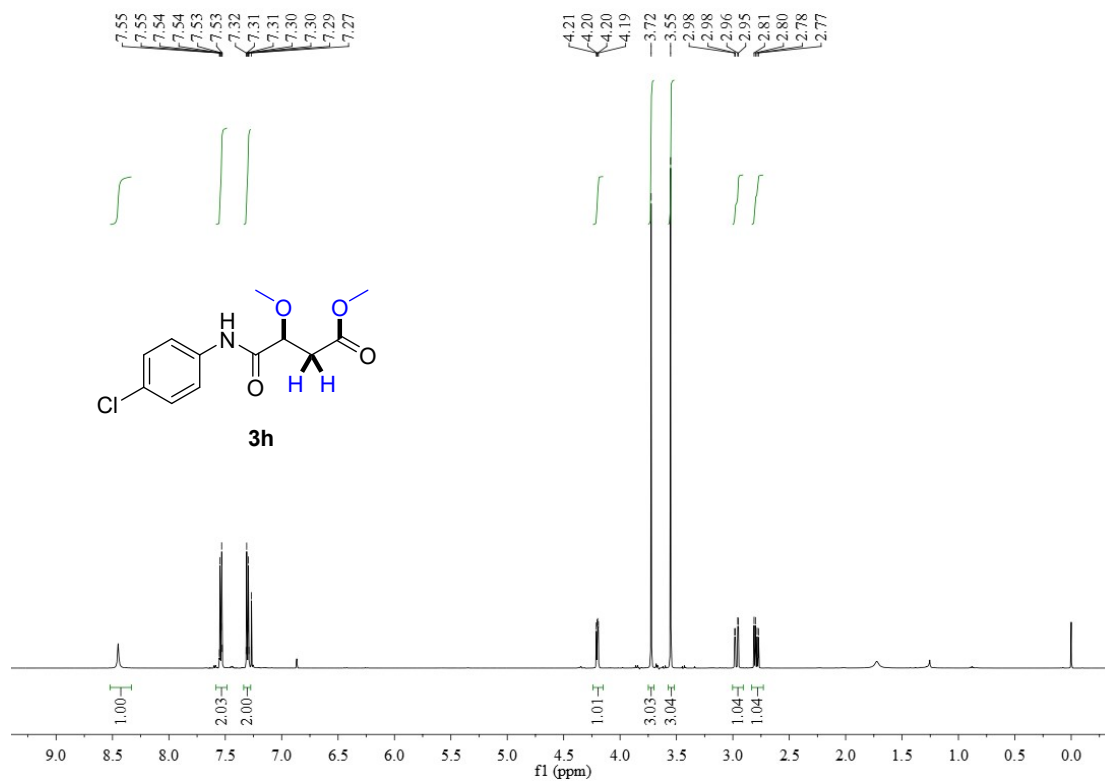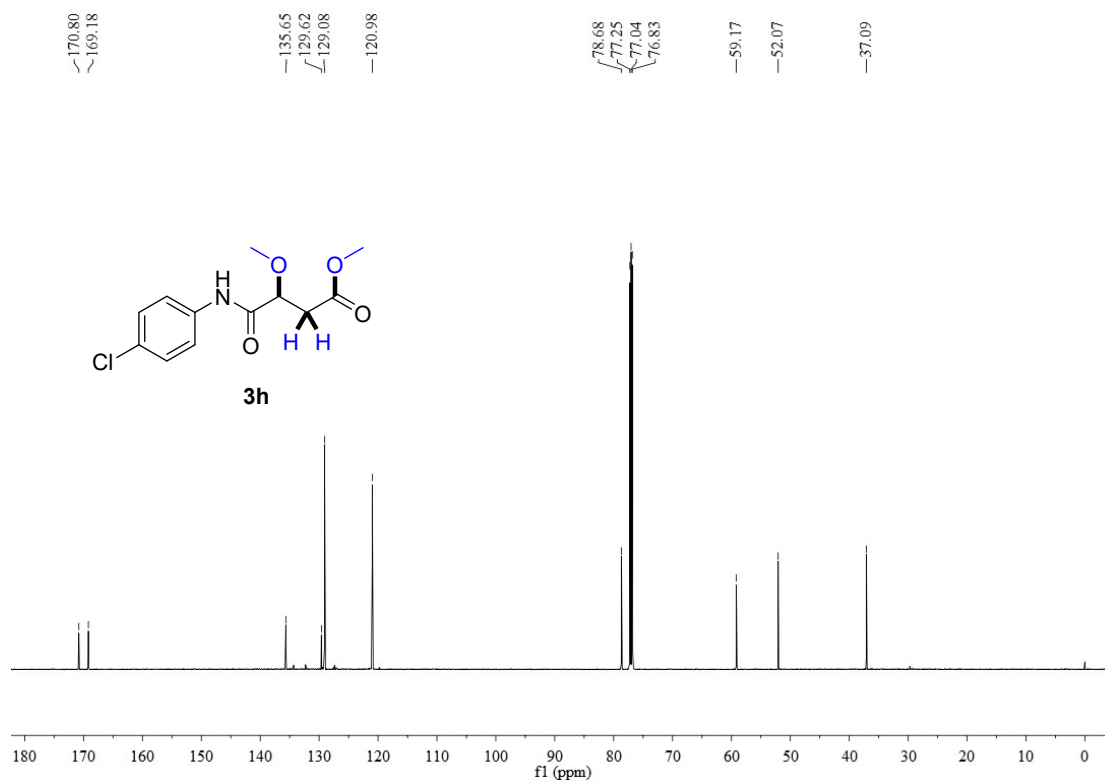

Methyl 4-((4-bromophenyl)amino)-3-methoxy-4-oxobutanoate (**3i**)

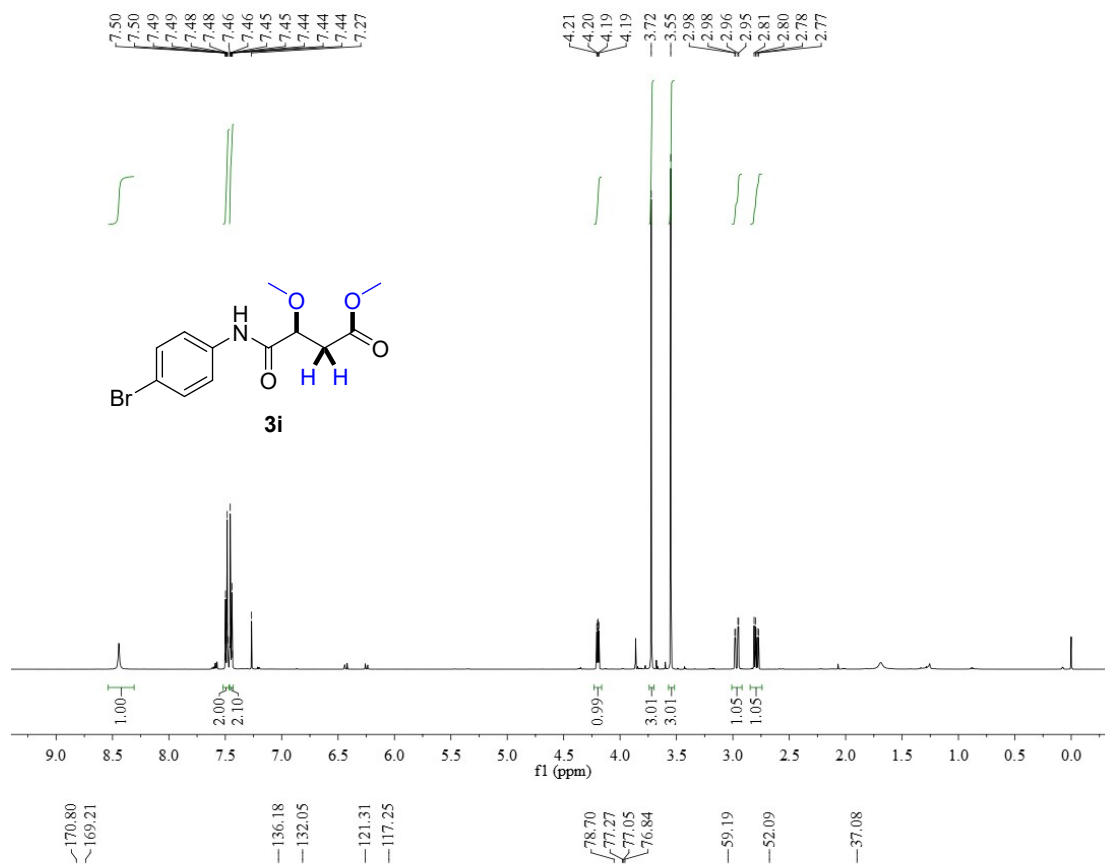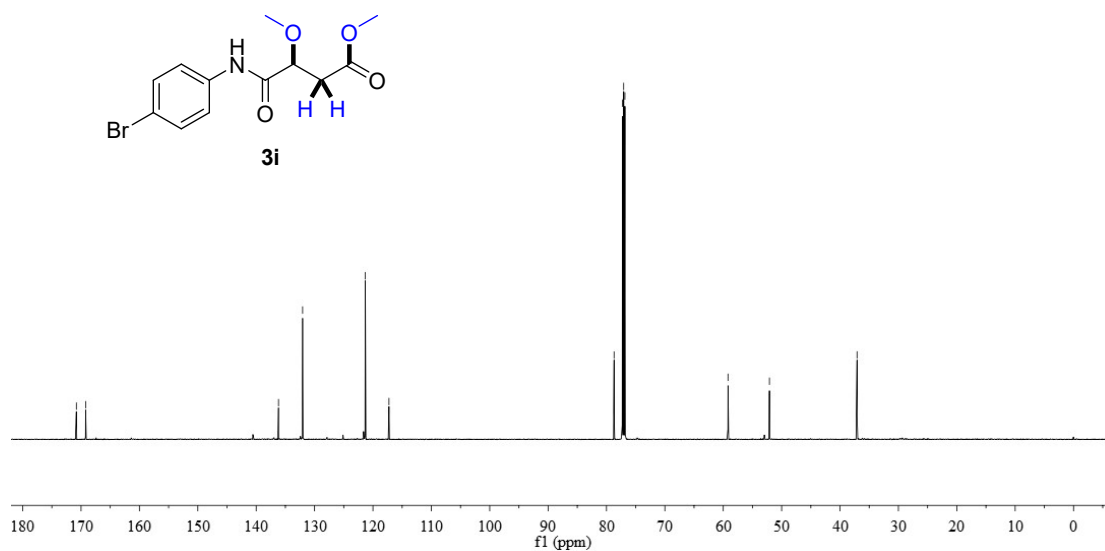

Methyl 4-((2-iodophenyl)amino)-3-methoxy-4-oxobutanoate (**3j**)

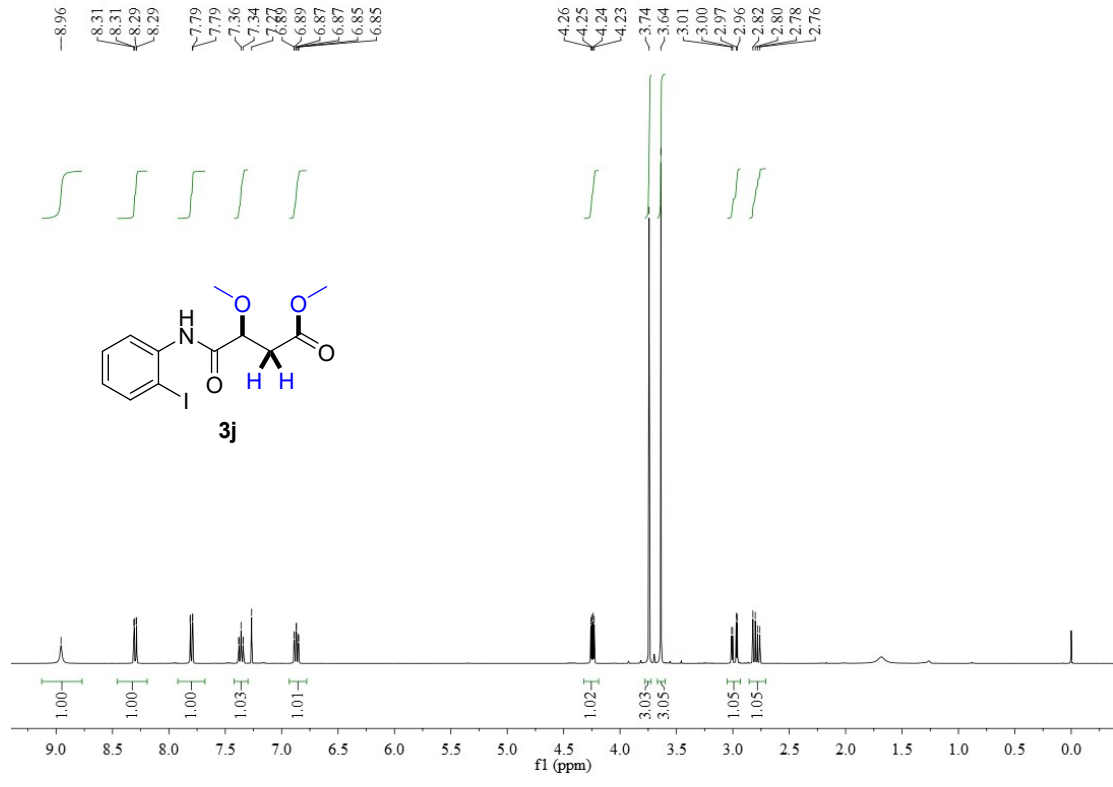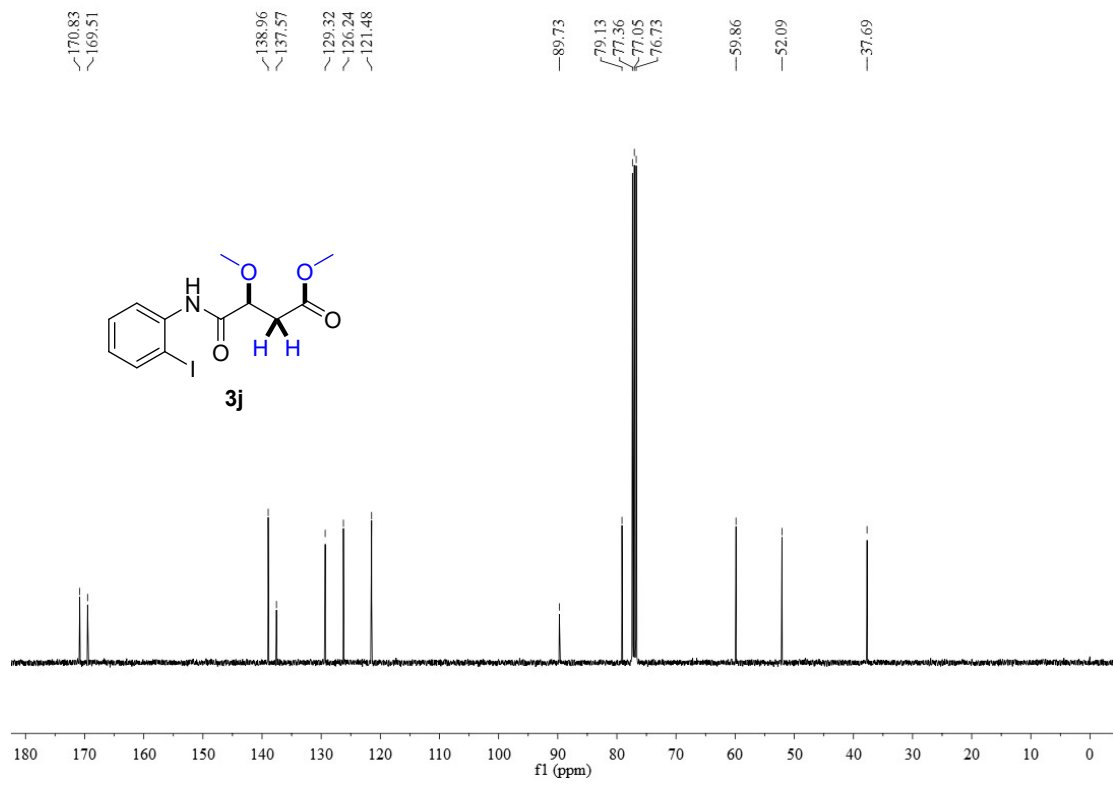

Methyl 4-(2,4-dimethoxy-4-oxobutanamido)benzoate (**3k**)

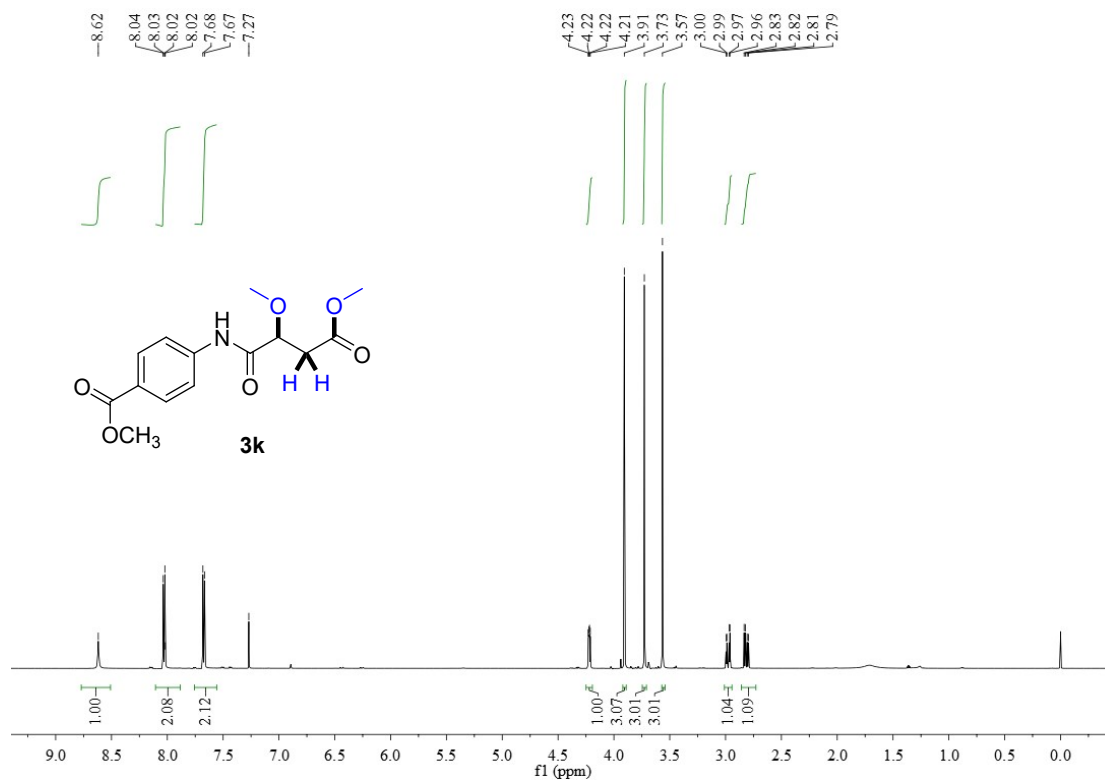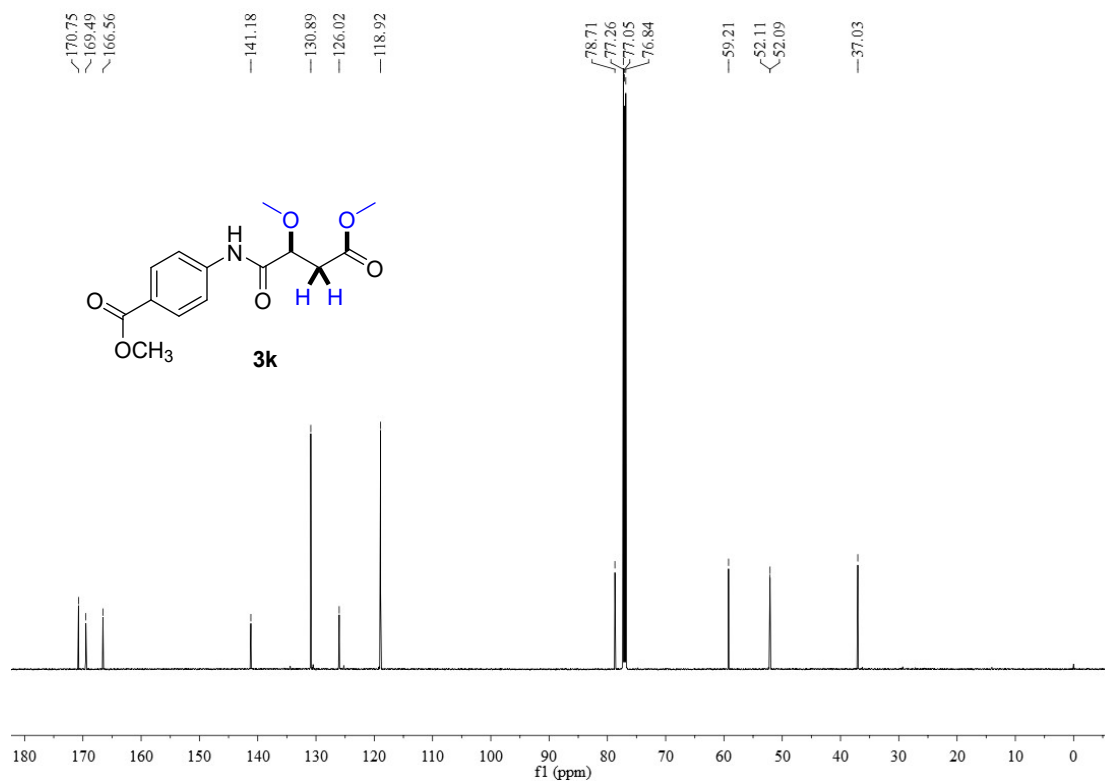

Methyl 3-methoxy-4-oxo-4-((4-(trifluoromethyl)phenyl)amino)butanoate (**31**)

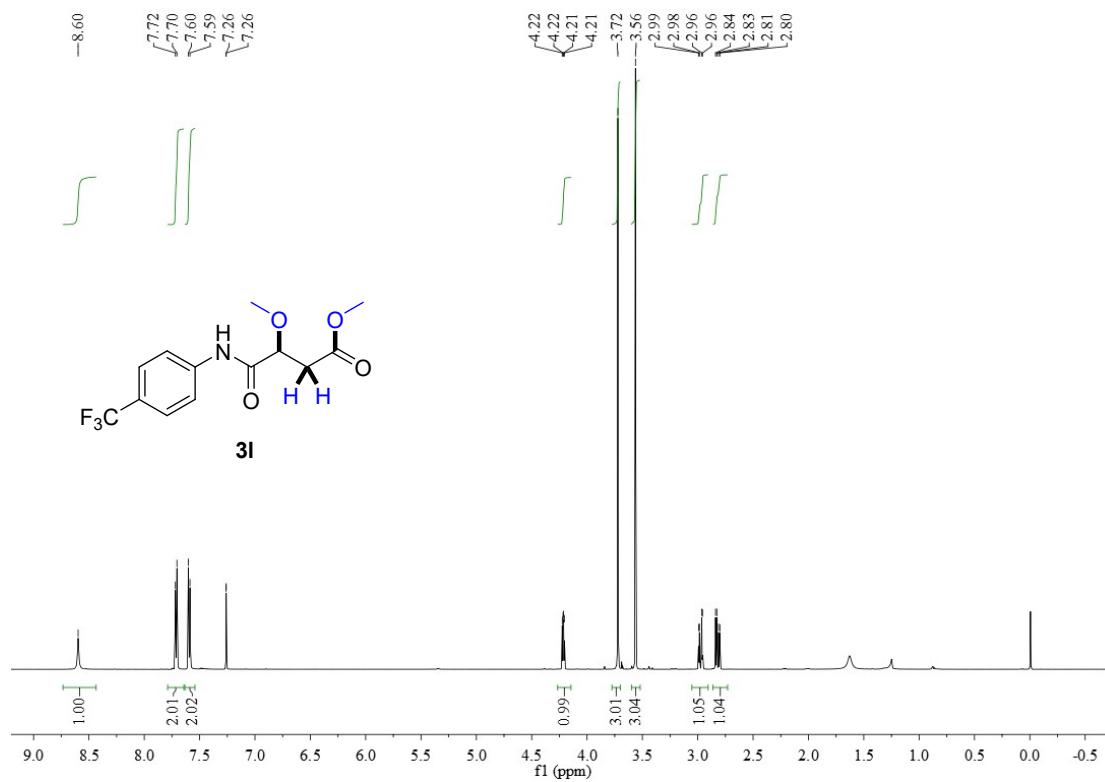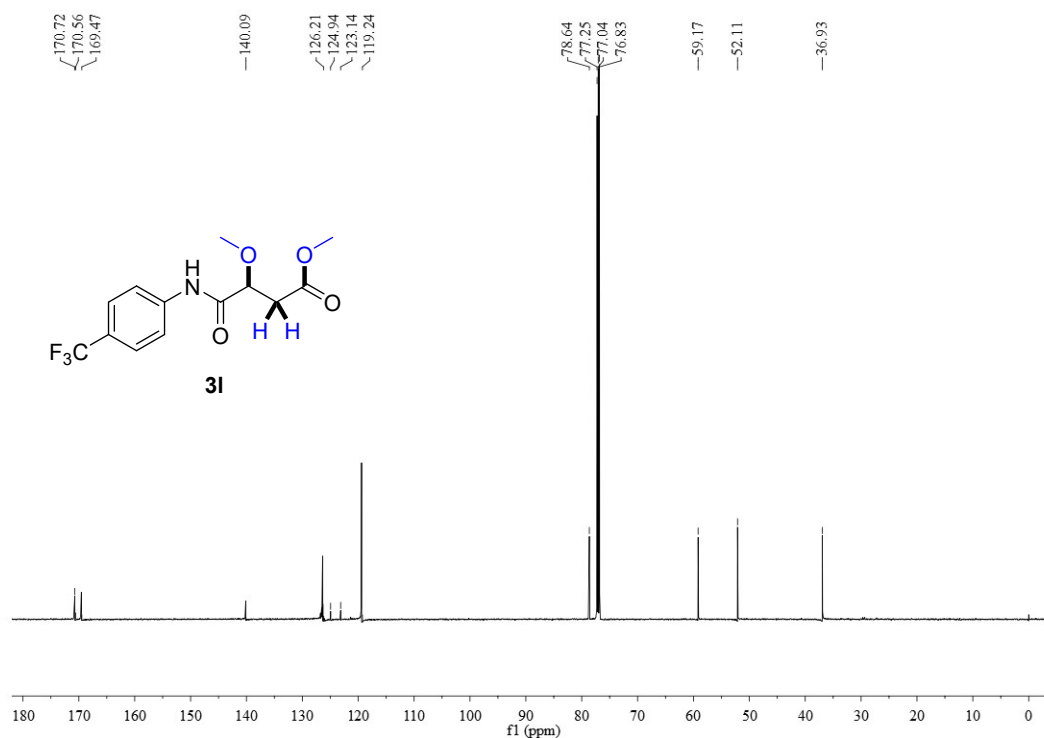

--62.18

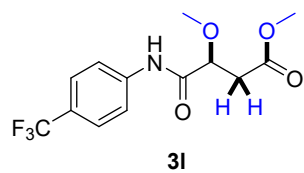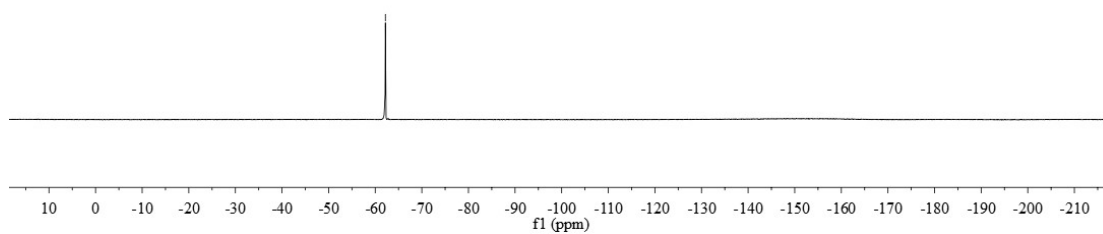

Methyl (S)-4-((4-cyanophenyl)amino)-3-methoxy-4-oxobutanoate (**3m**)

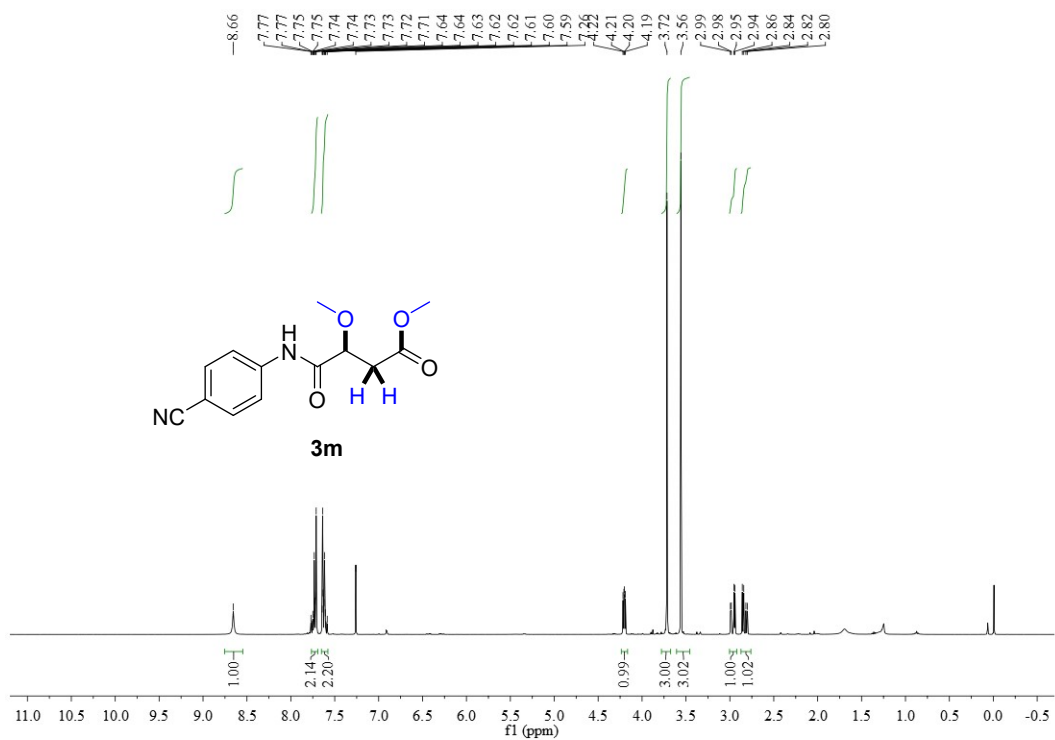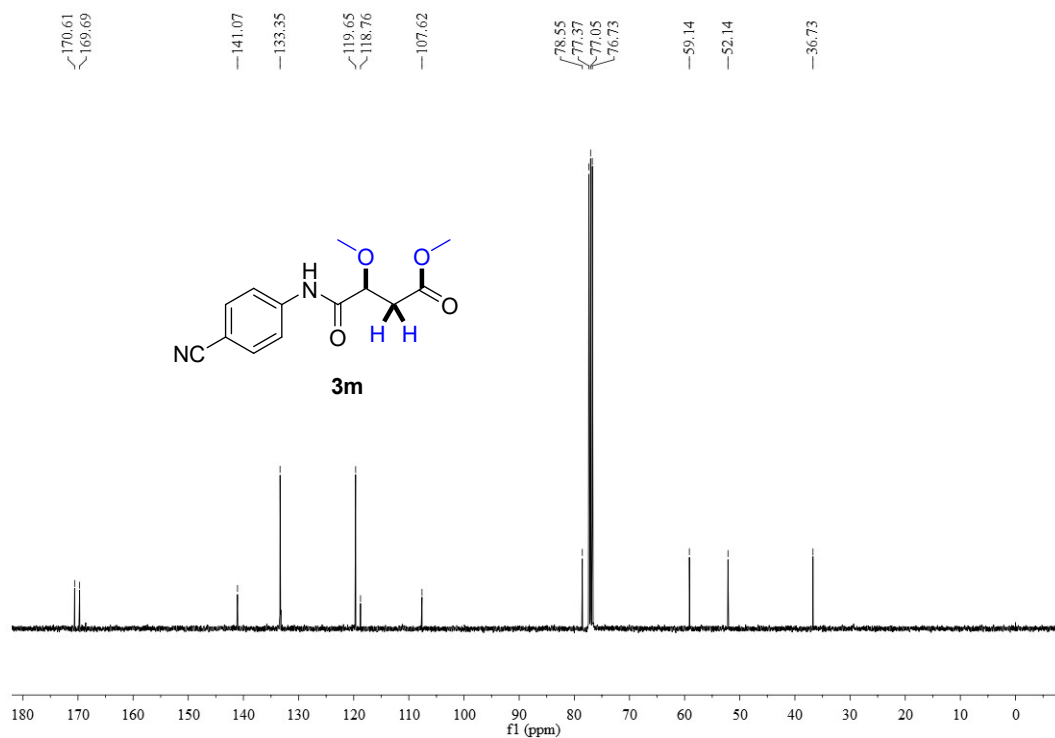



Methyl 4-([1,1'-biphenyl]-4-ylamino)-3-methoxy-4-oxobutanoate (**3n**)

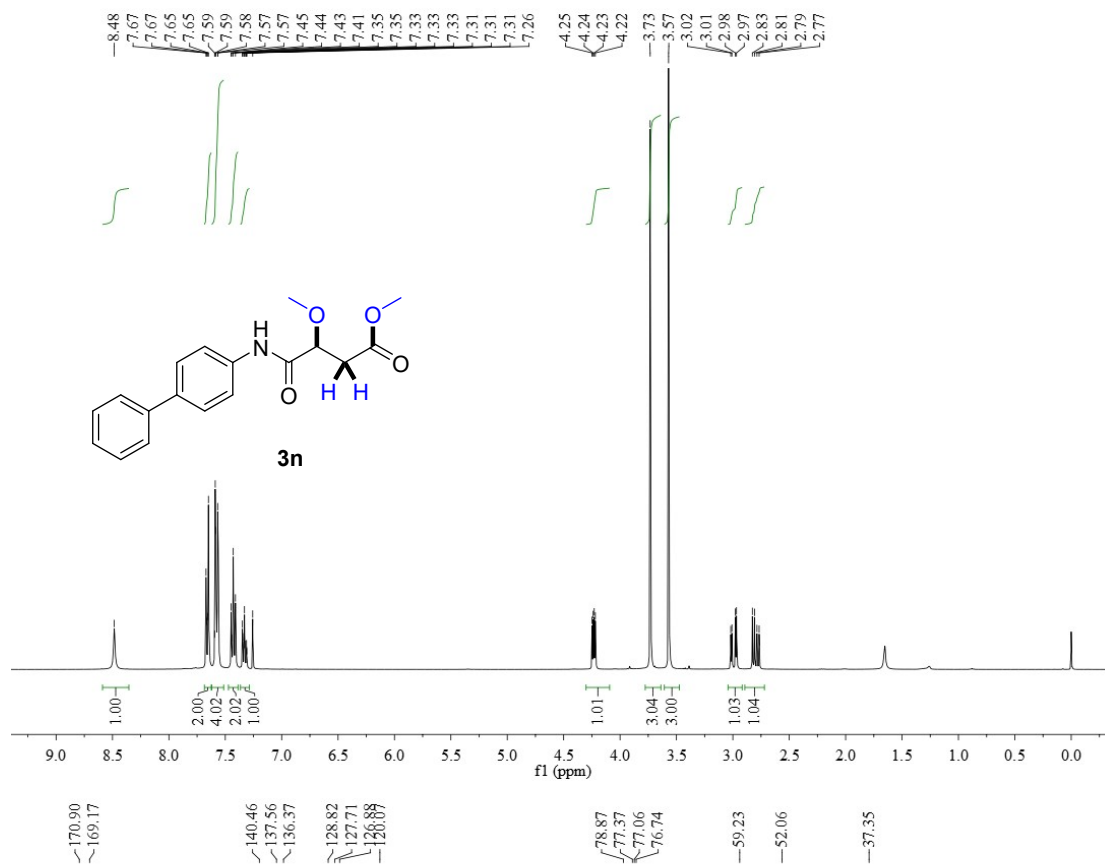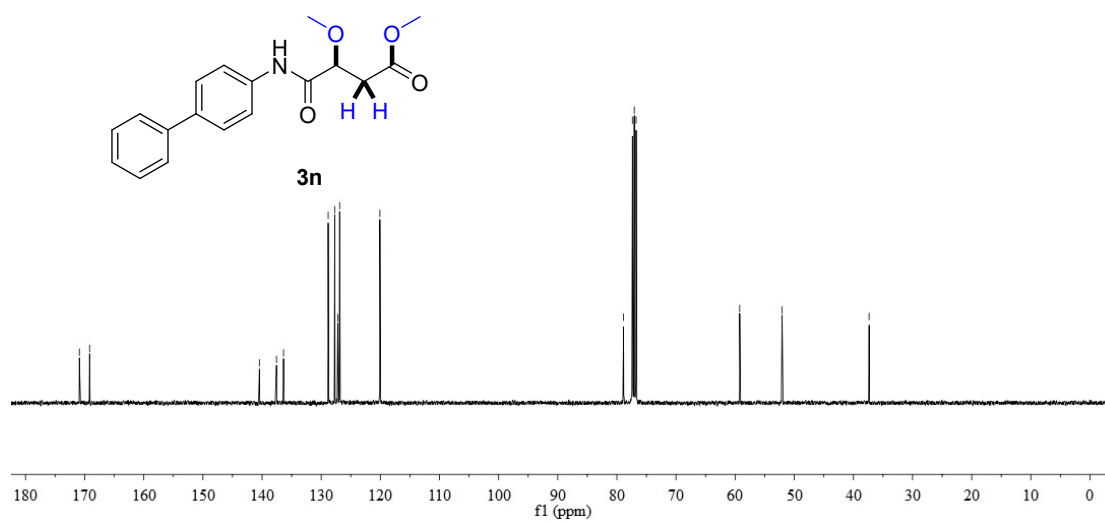

Methyl 3-methoxy-4-(naphthalen-2-ylamino)-4-oxobutanoate (**3o**)

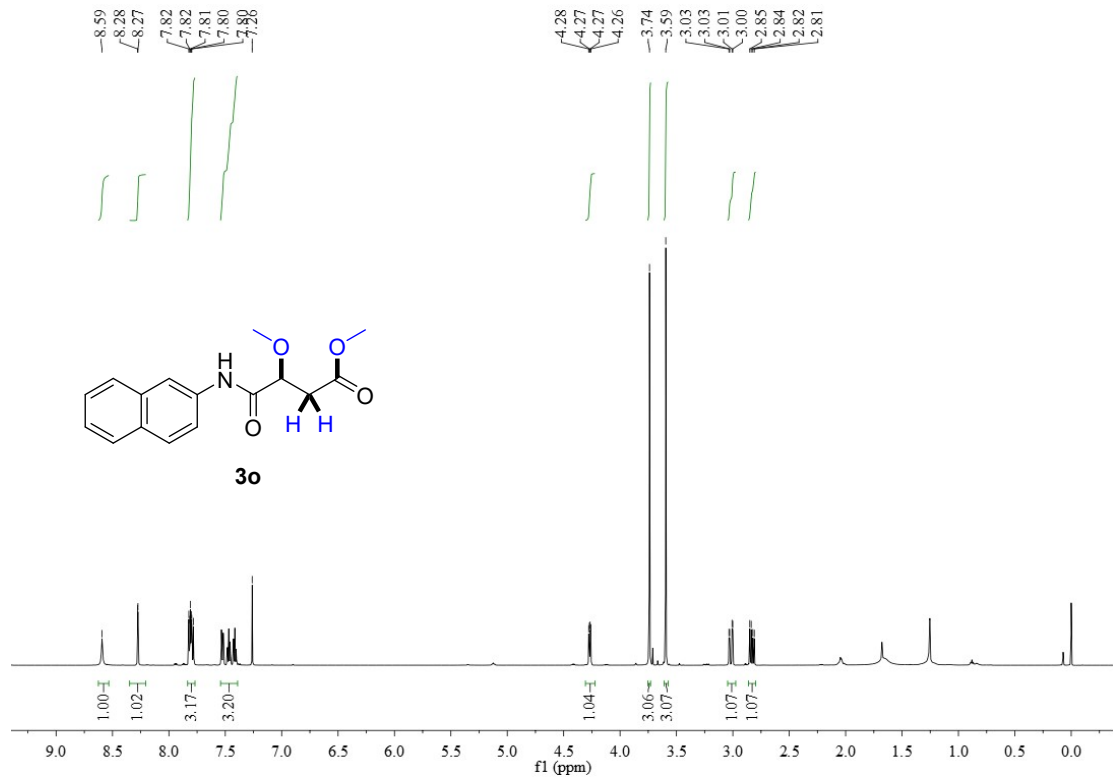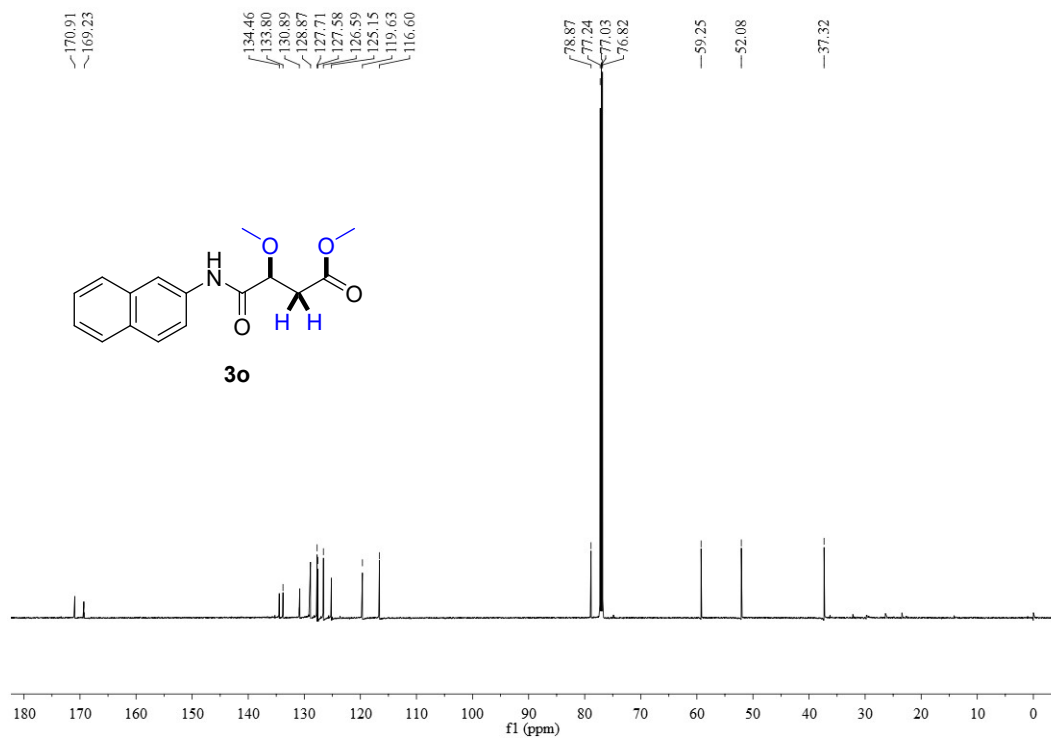

Methyl 4-((2-chloropyridin-3-yl)amino)-3-methoxy-4-oxobutanoate (**3p**)

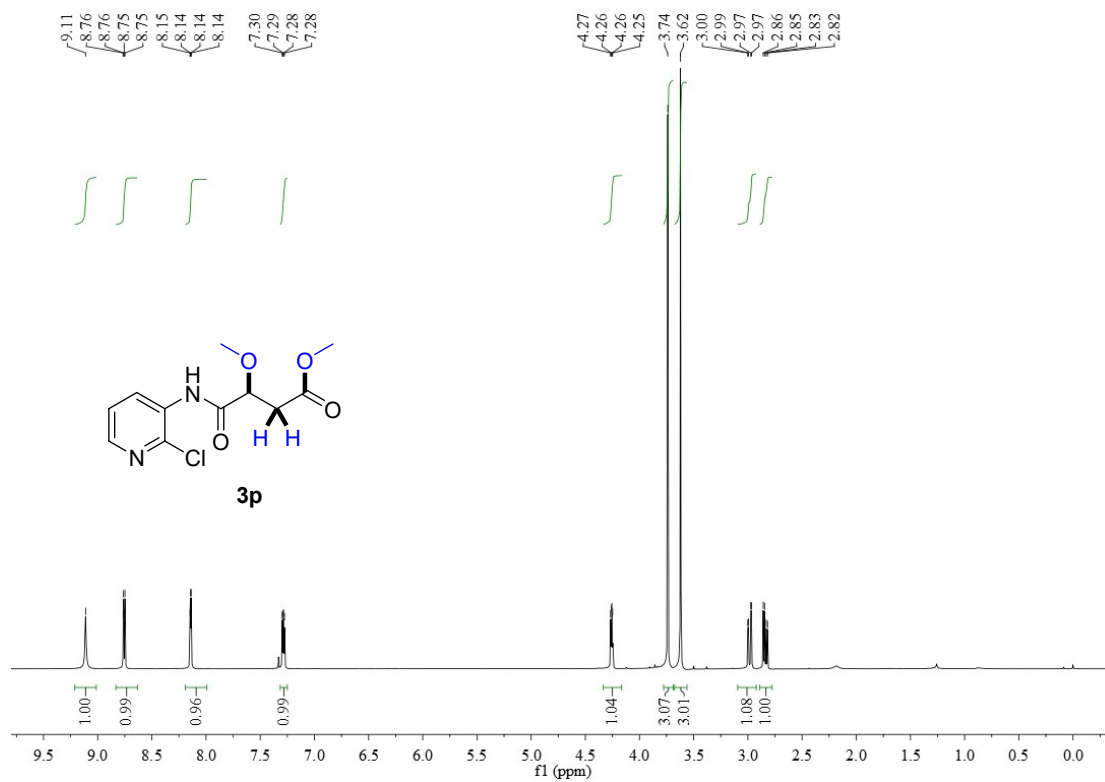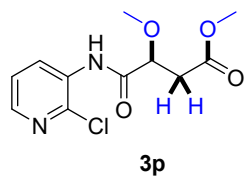

170.54  
170.05  
144.16  
140.28  
131.25  
128.60  
123.31

78.69  
77.37  
77.16  
76.95  
59.40  
52.06  
37.05

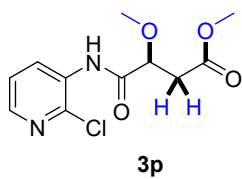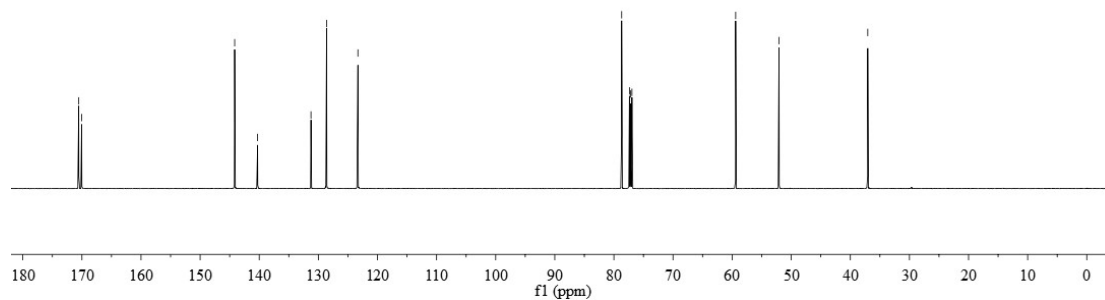

Dimethyl 4,4'-((sulfonylbis(4,1-phenylene))bis(azanediy))bis(3-methoxy-4-oxobutanoate) (**3q**)

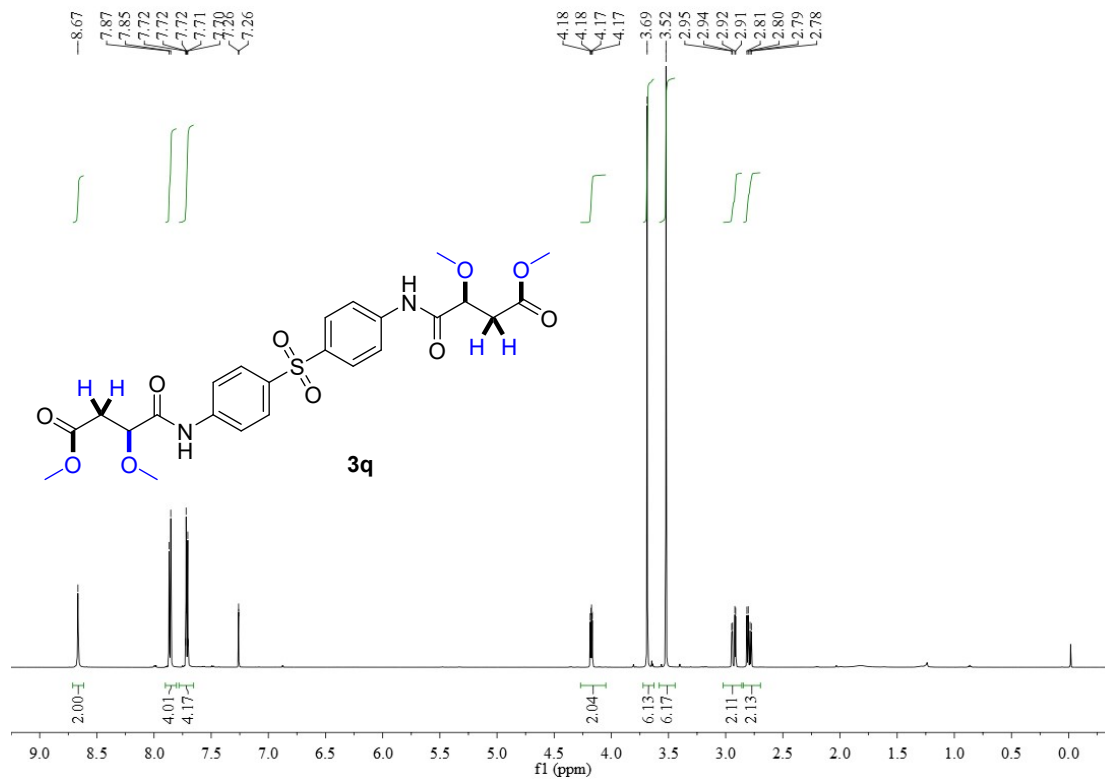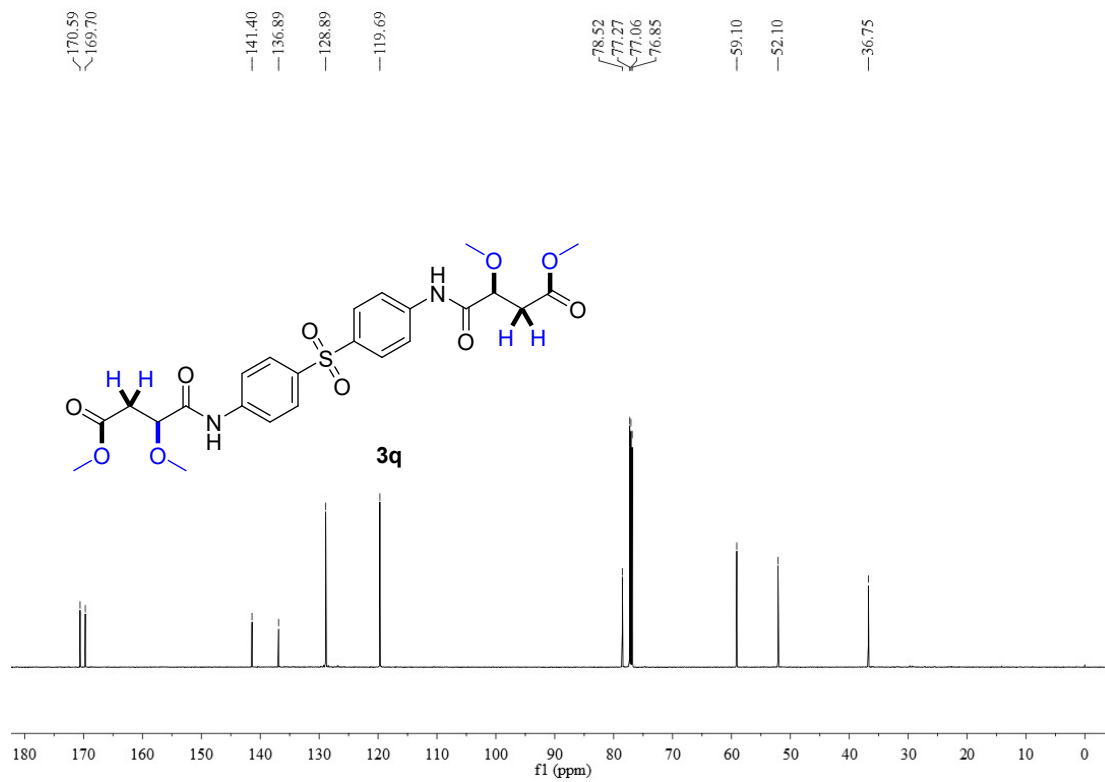

Ethyl 4-(2,4-dimethoxy-4-oxobutanamido)benzoate (**3r**)

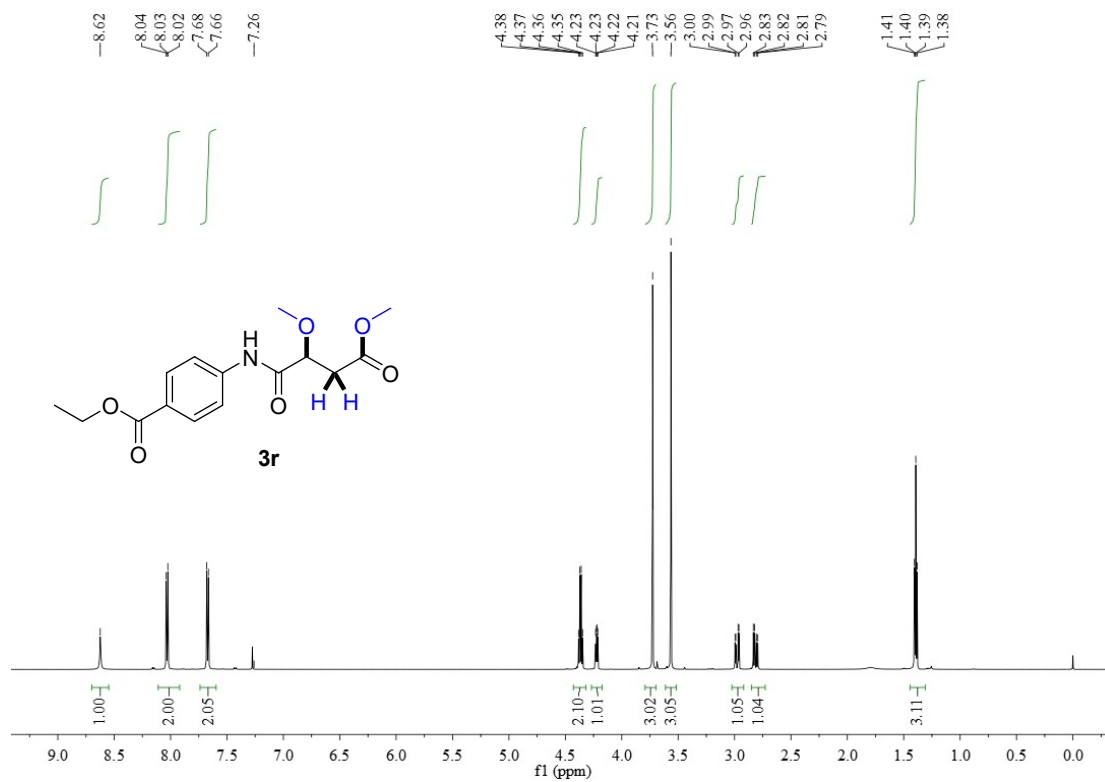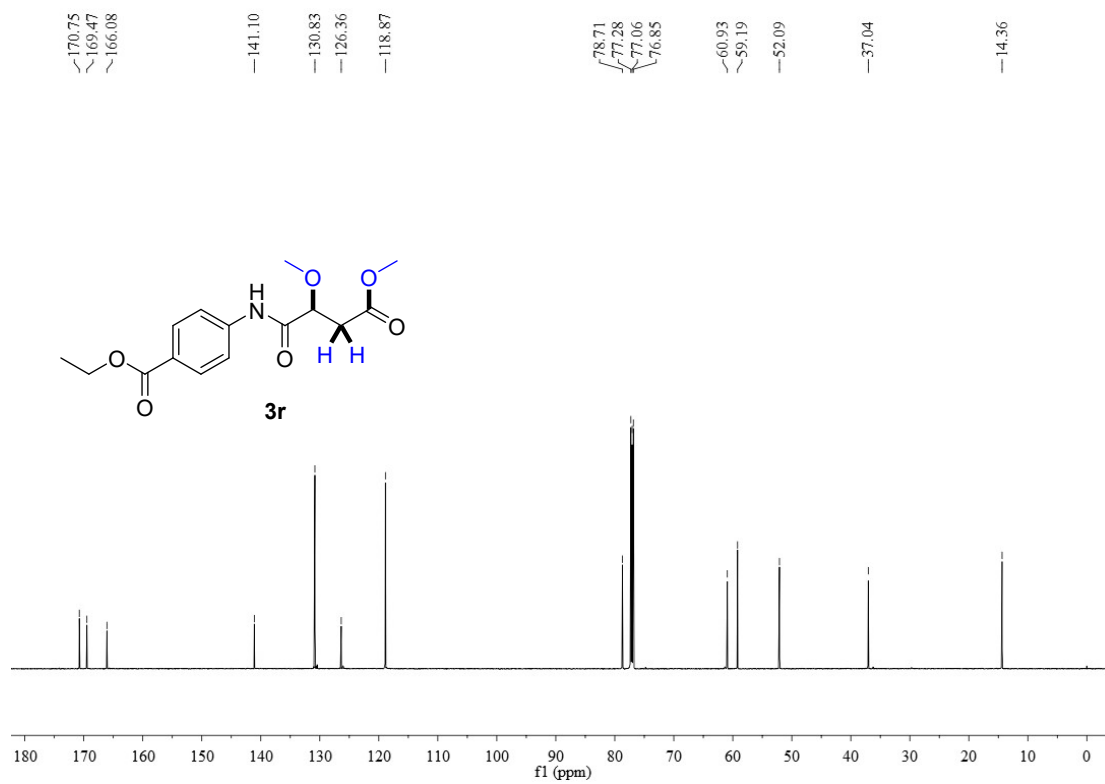

*1-Benzyl-3-methoxypyrrolidine-2,5-dione (3s)*

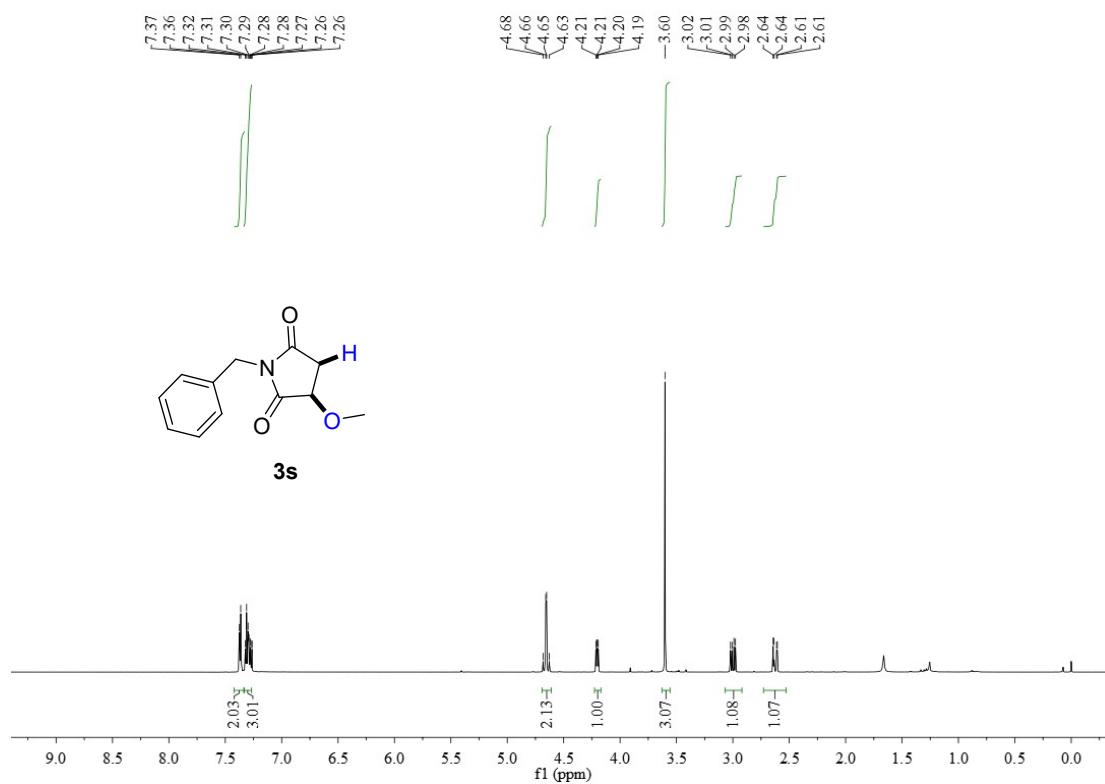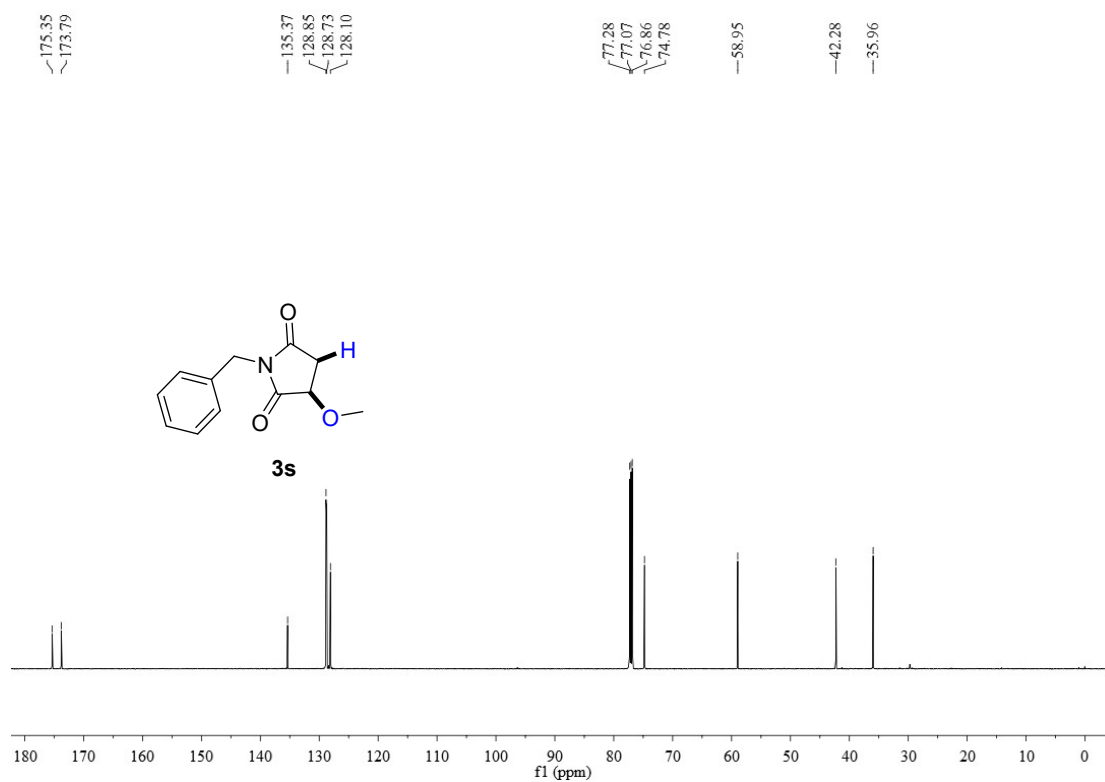

1-Cyclohexyl-3-methoxypyrrolidine-2,5-dione (**3t**)

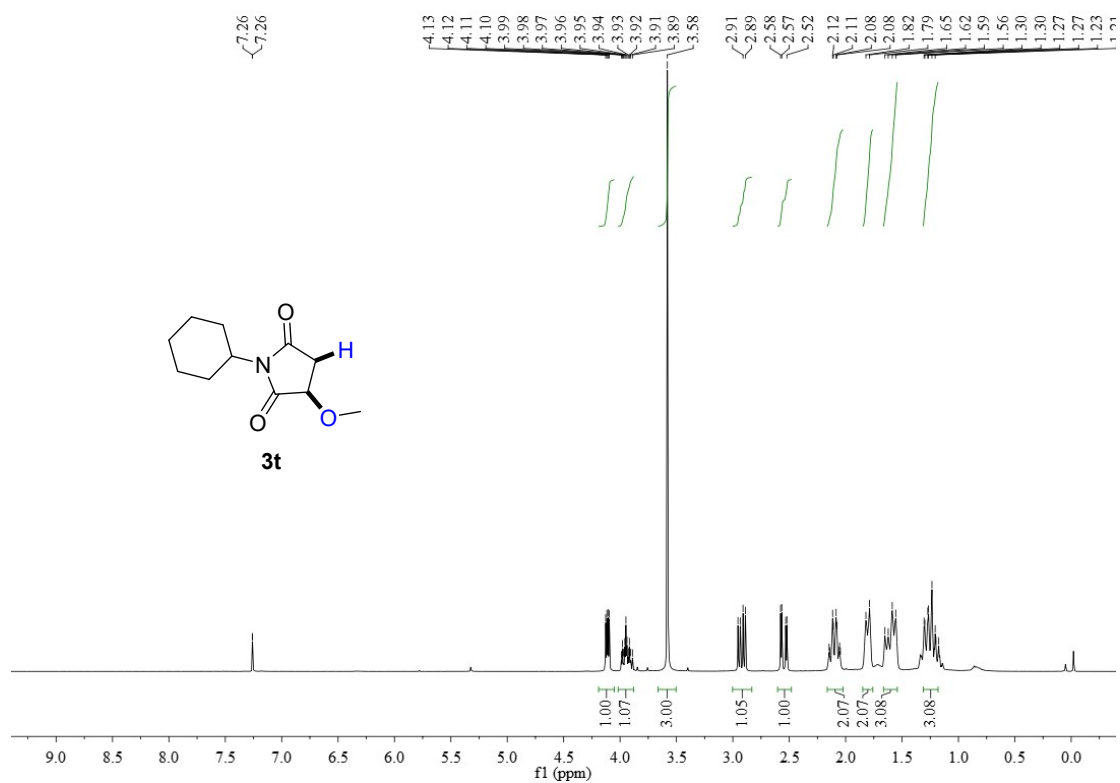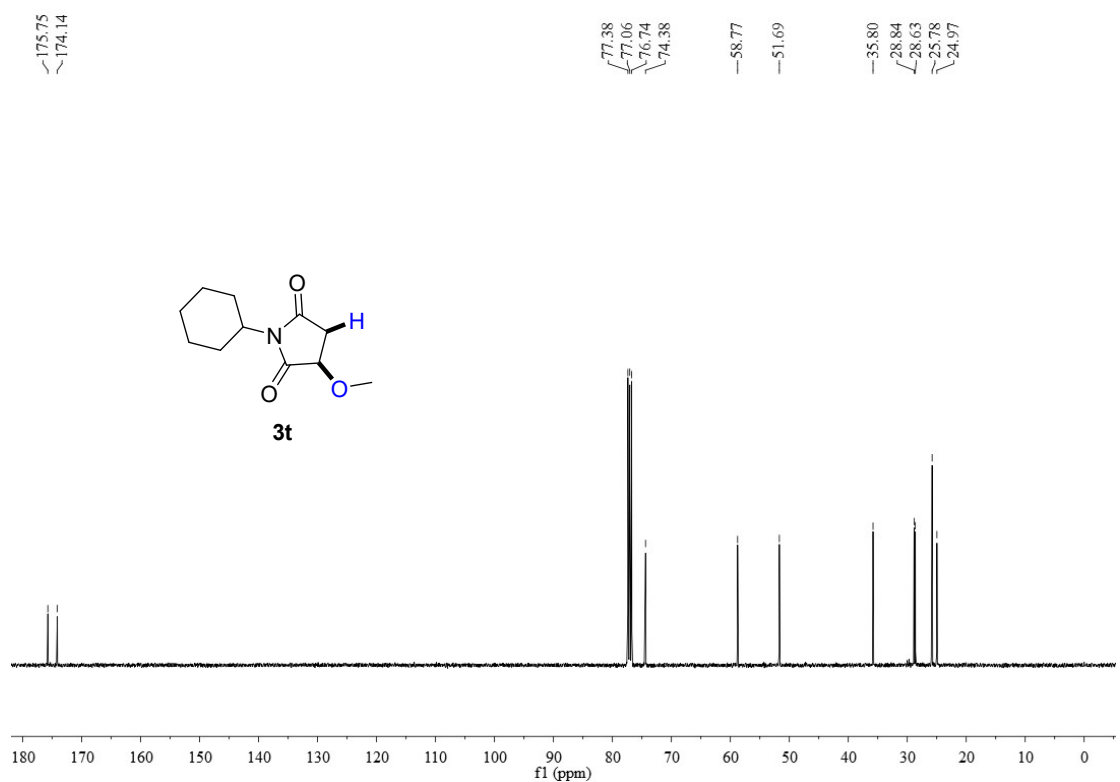

*Ethyl 3-ethoxy-4-oxo-4-(phenylamino)butanoate (3u)*

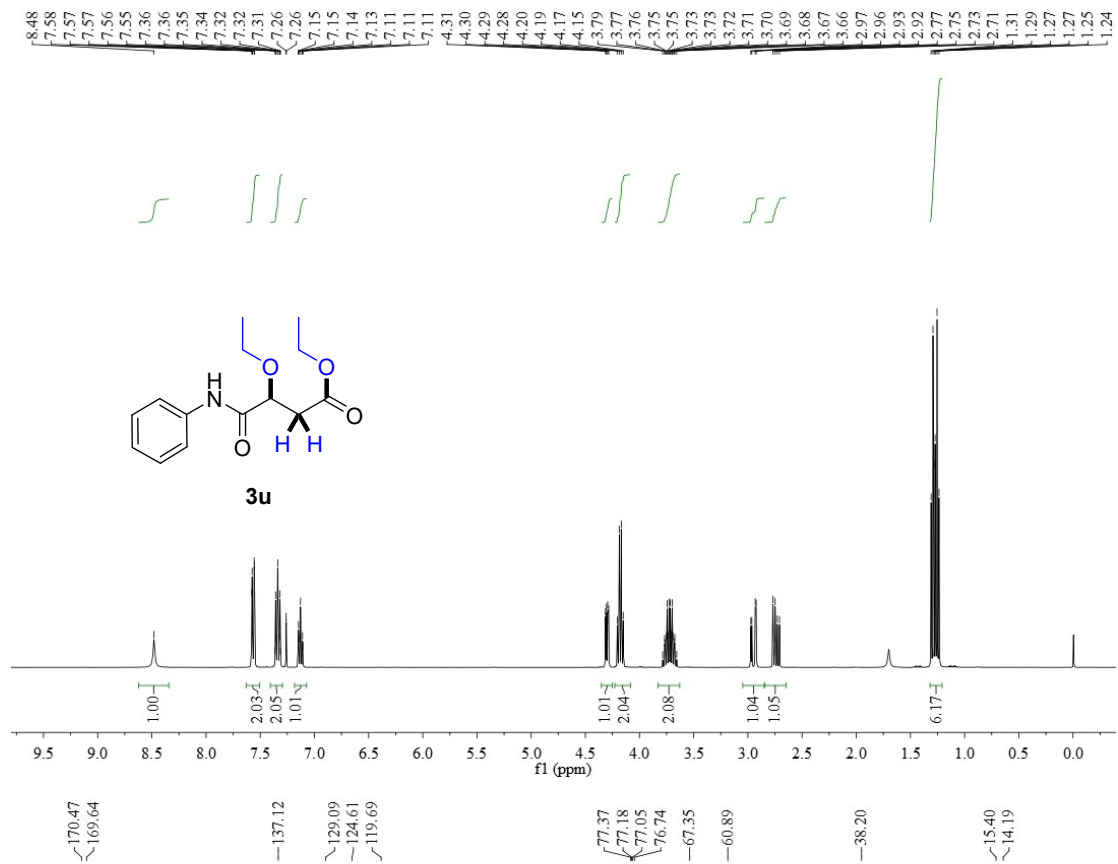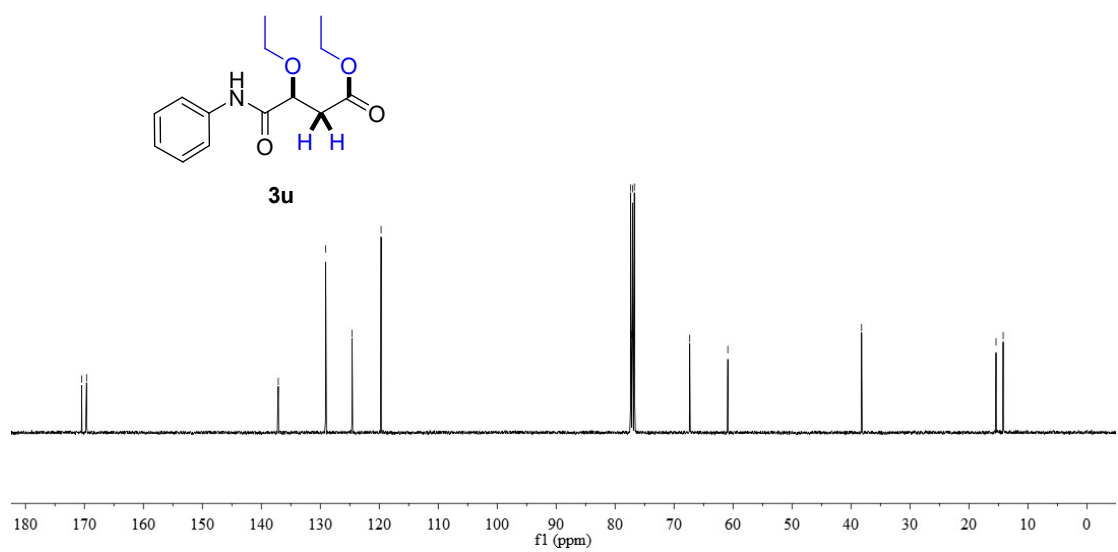



Propyl 4-oxo-4-(phenylamino)-3-propoxybutanoate (**3v**)

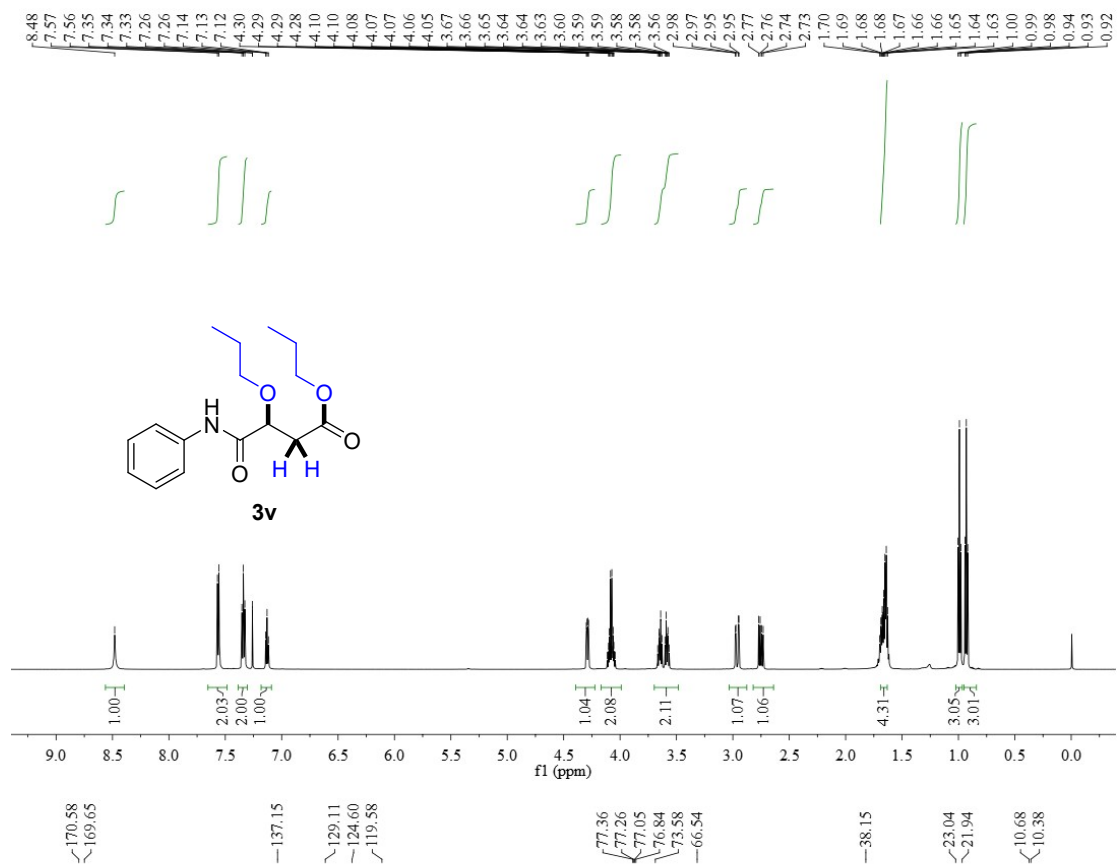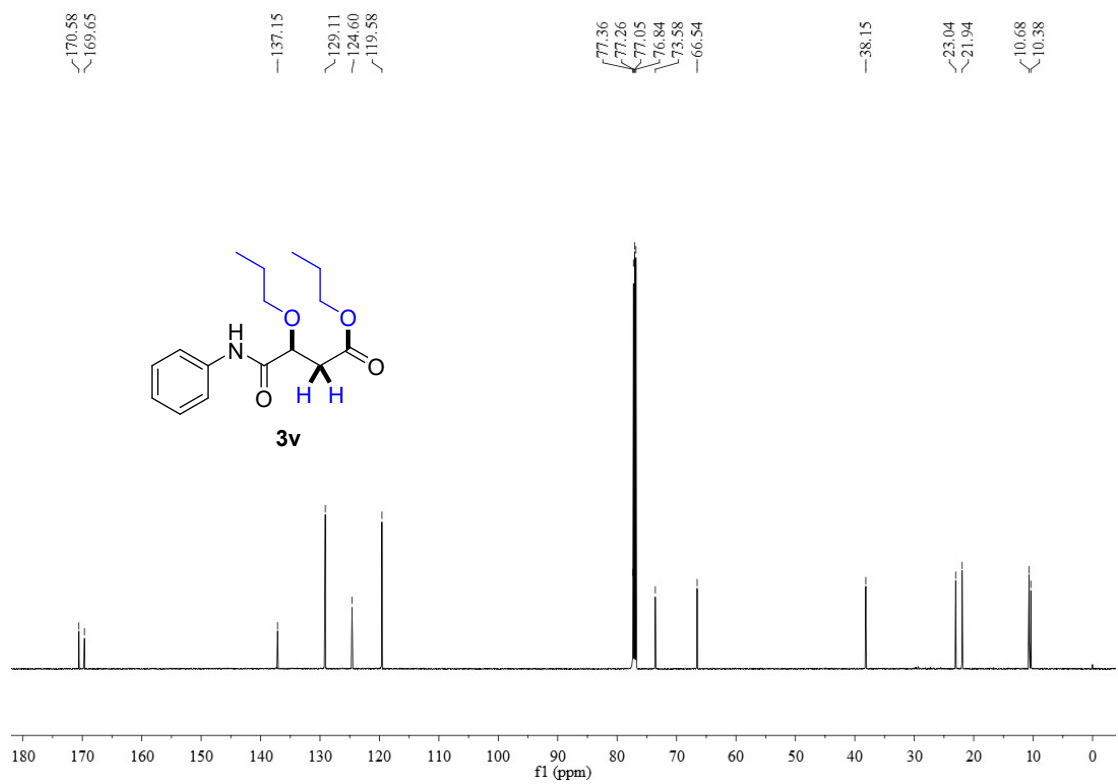

Allyl 3-(allyloxy)-4-oxo-4-(phenylamino)butanoate (**3w**)

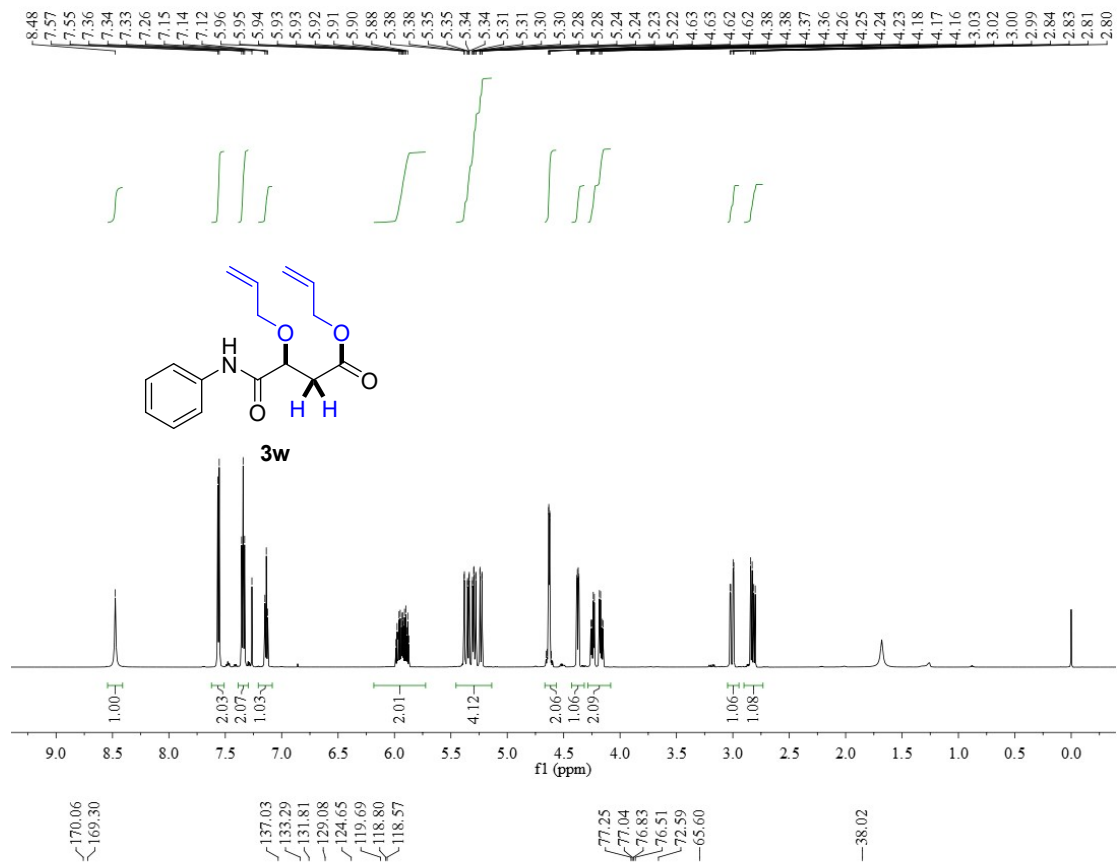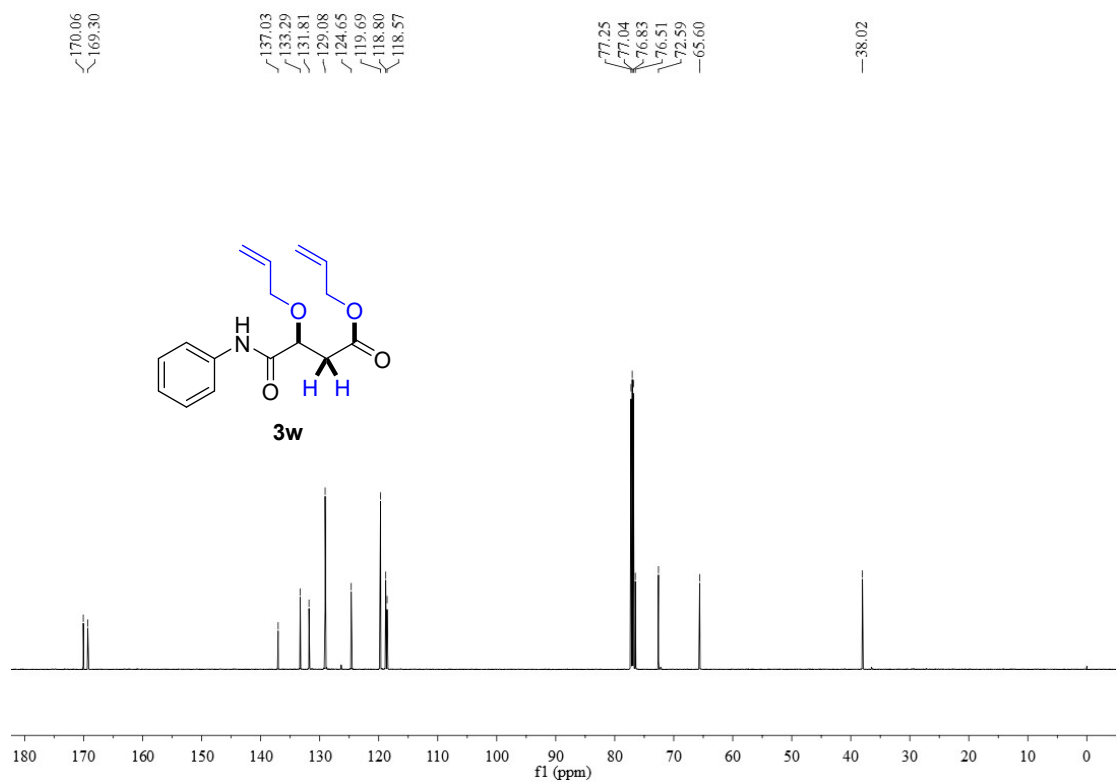

*But-3-en-1-yl 3-(but-3-en-1-yloxy)-4-oxo-4-(phenylamino)butanoate (3x)*

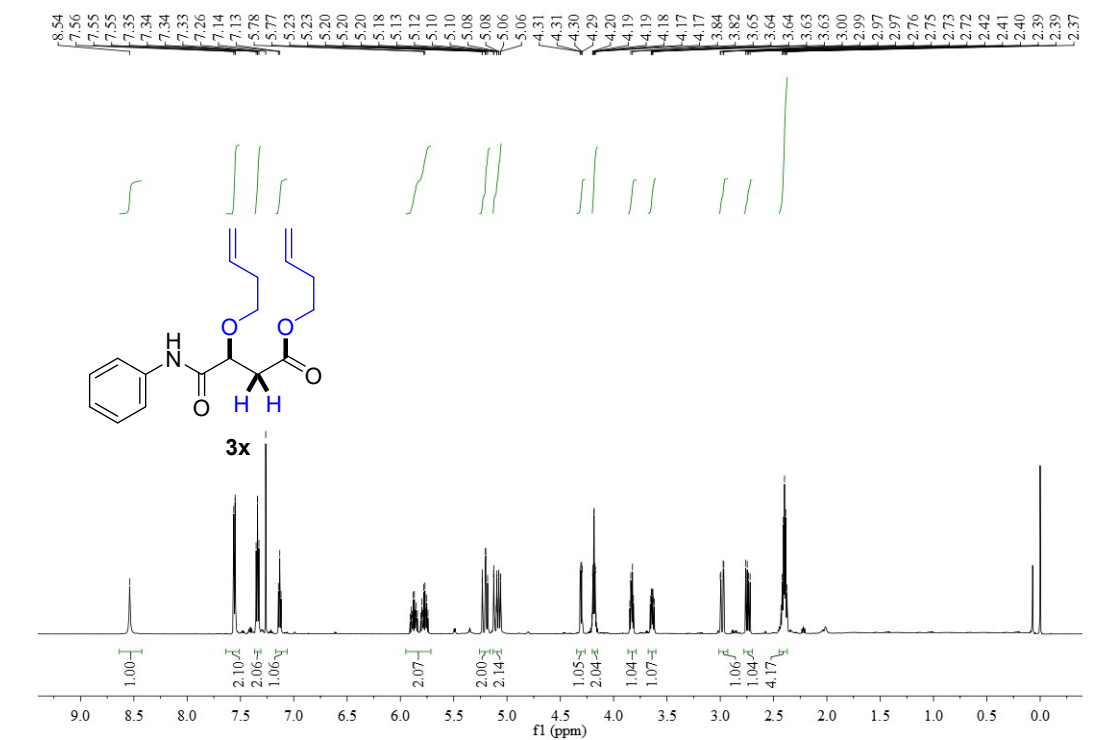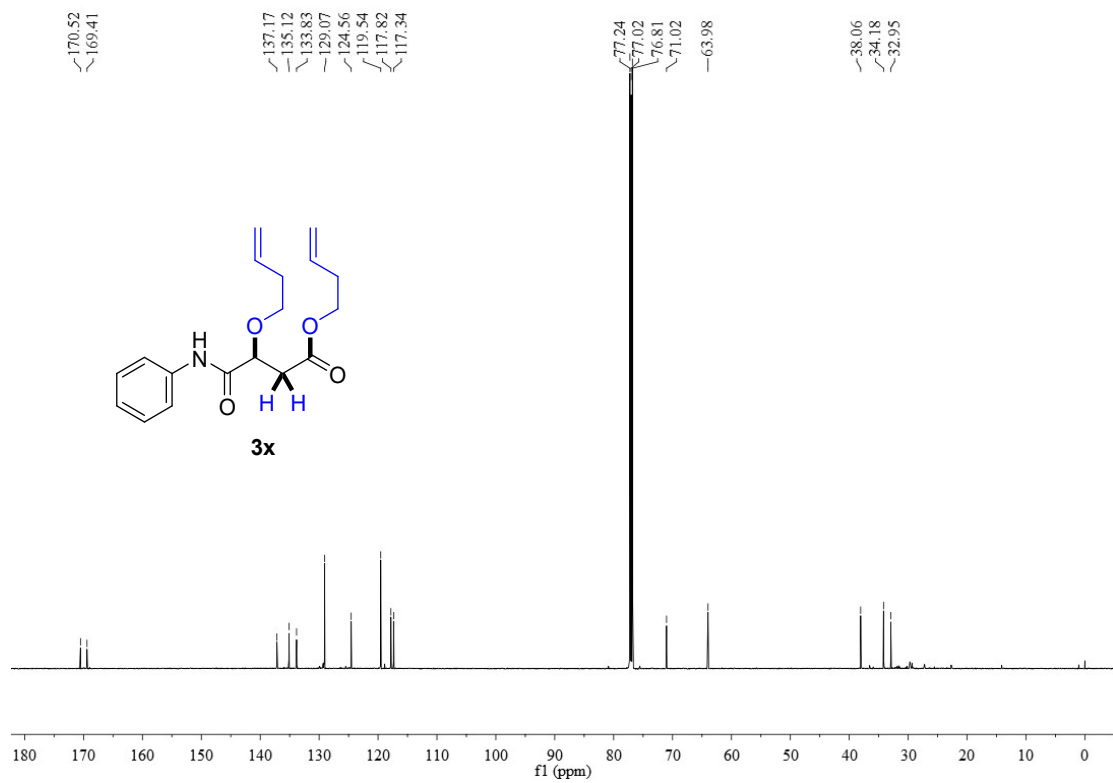

*But-3-yn-1-yl 3-(but-3-yn-1-yloxy)-4-oxo-4-(phenylamino)butanoate (3y)*

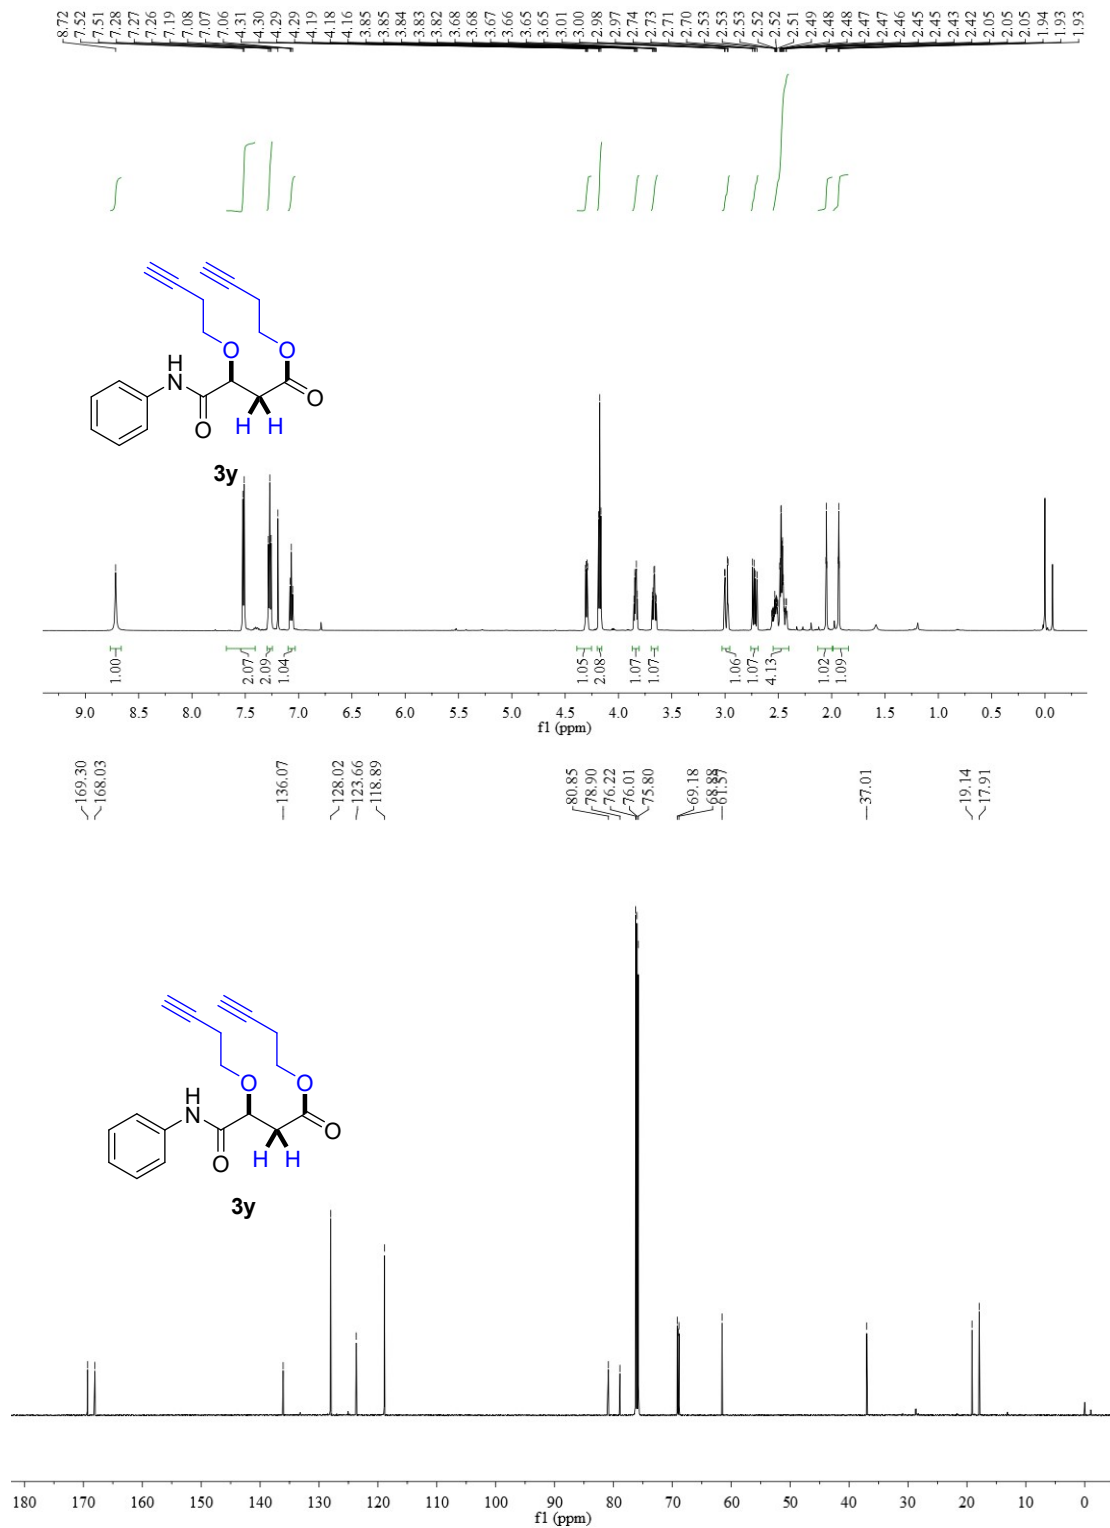

Cyclopropylmethyl 3-(cyclopropylmethoxy)-4-oxo-4-(phenylamino)butanoate (**3z**)

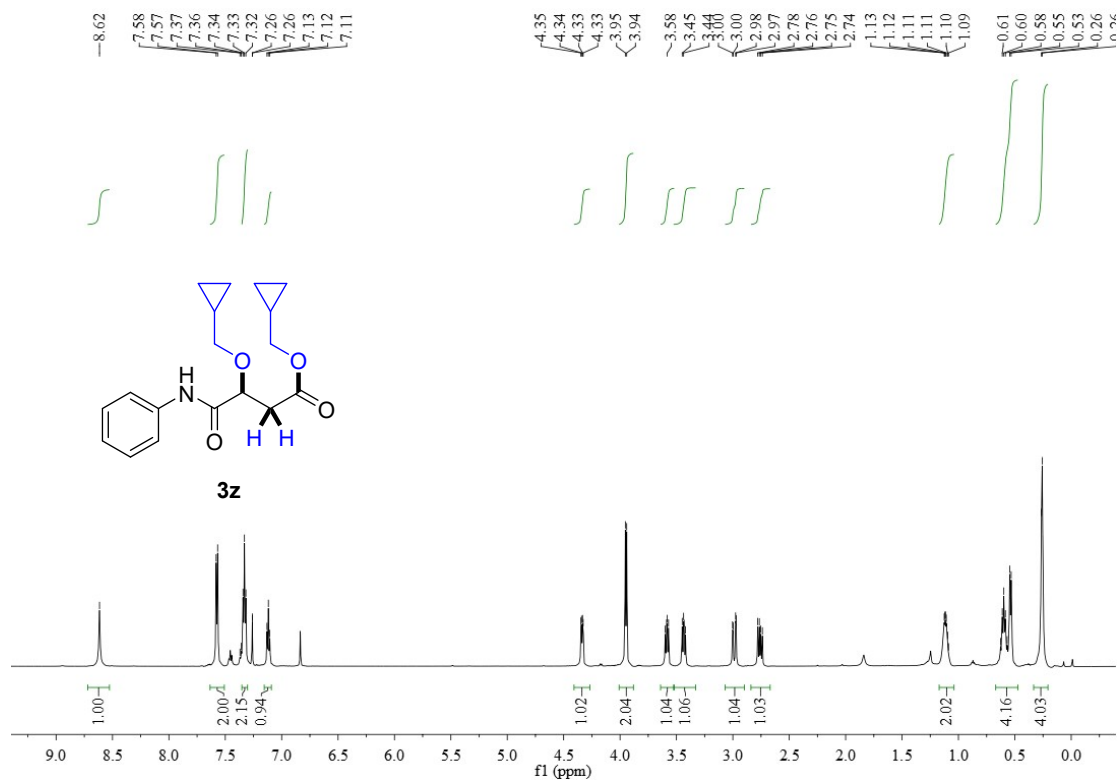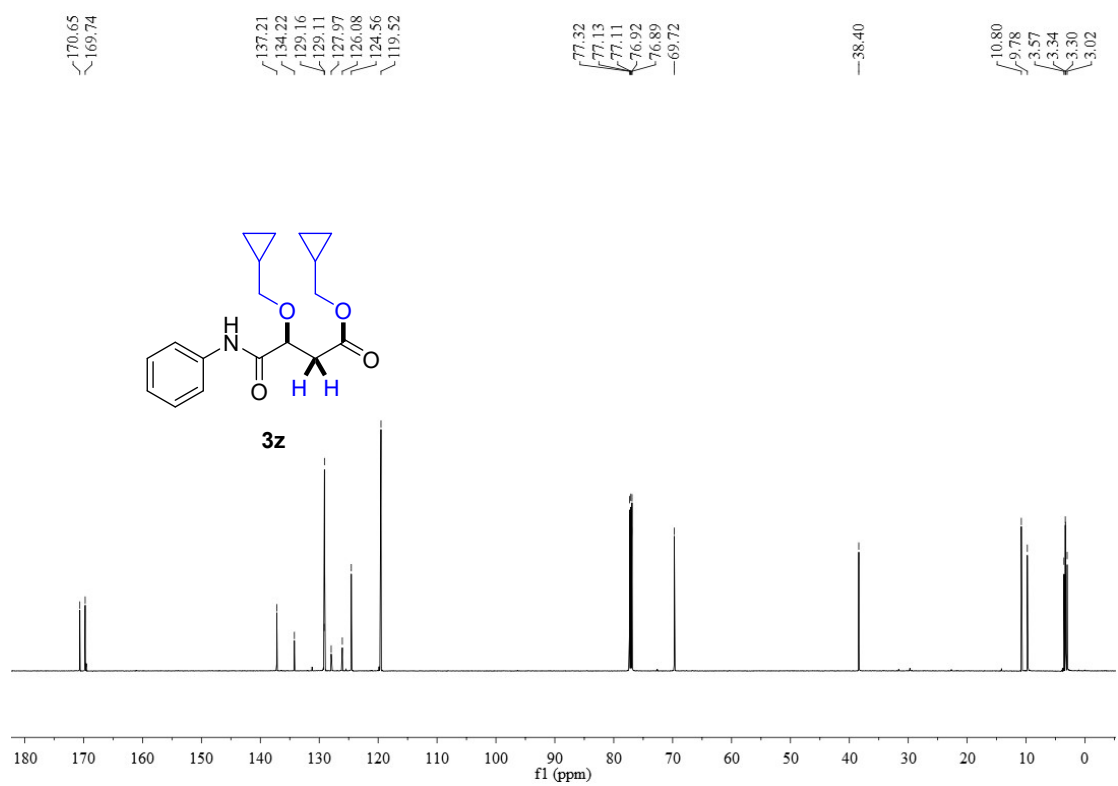

*Furan-2-ylmethyl 3-(furan-2-ylmethoxy)-4-oxo-4-(phenylamino)butanoate (3ah)*

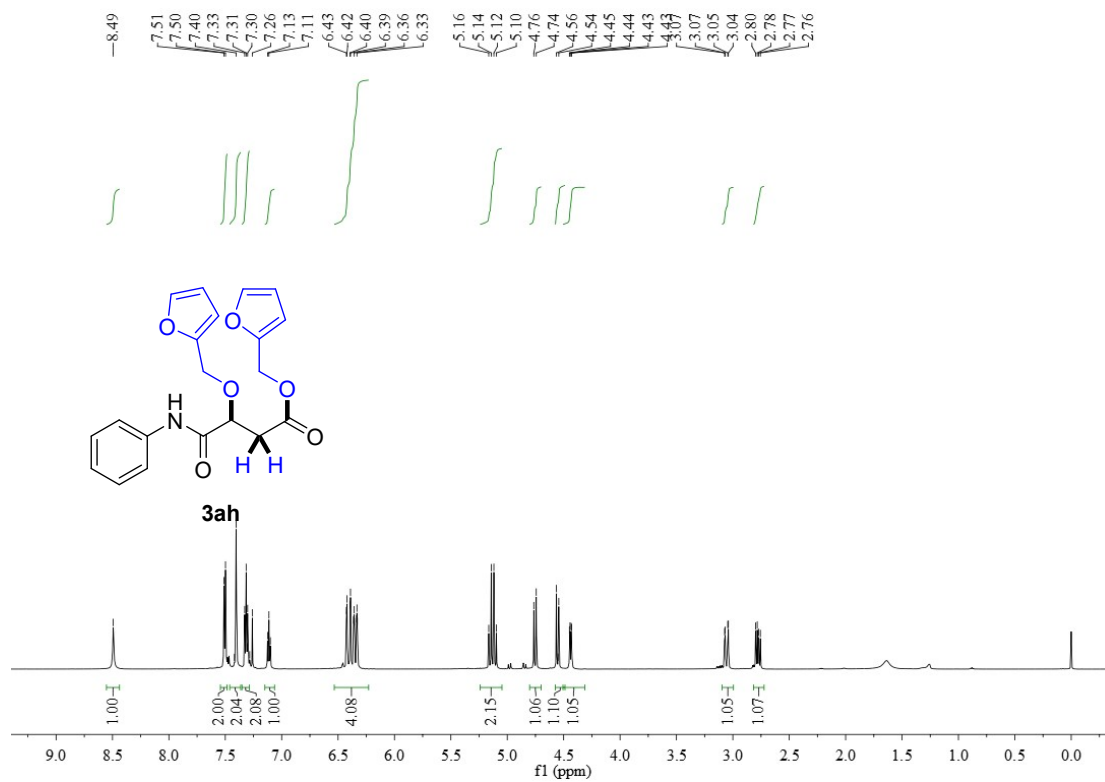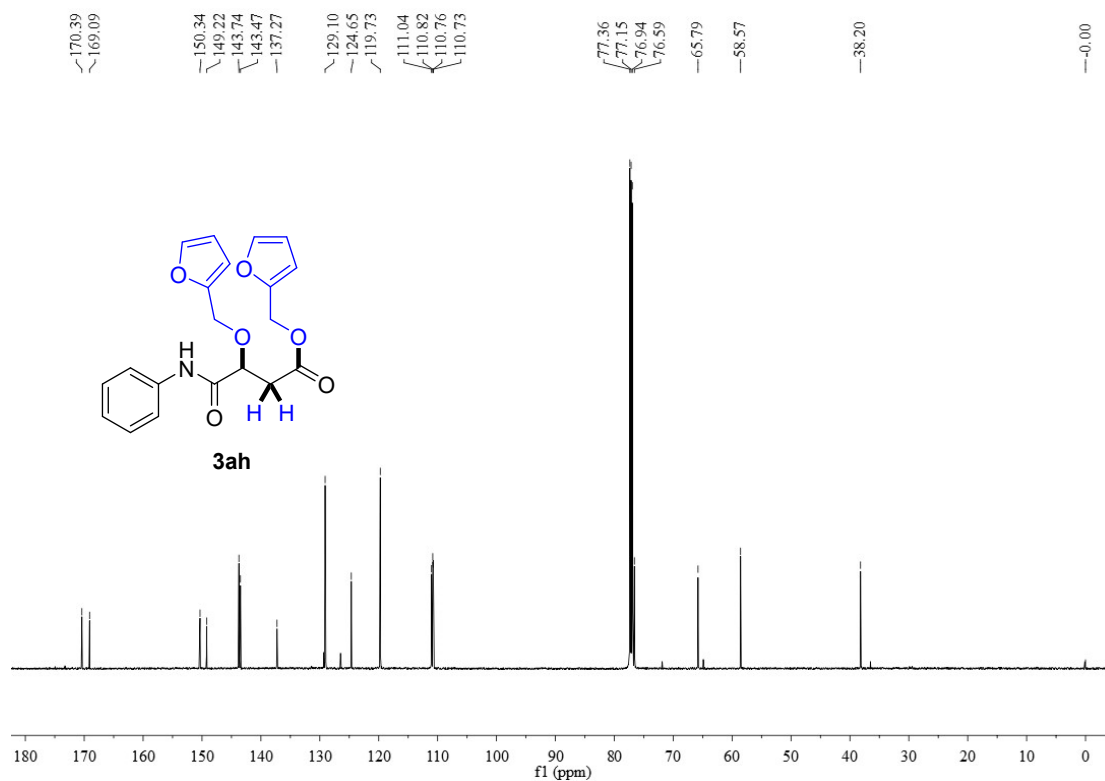

Supplement: d3ob00178d1.pdf [file d3ob00178d1.pdf]
